# Supplementary material for: Ancillary ligand-regulated Ti(iv)-based metallocalixarene coordination cages for photocatalytic H2 evolution
Source: Royal Society of Chemistry journal article supplement (doi:10.1039/d2cc03131k), 2022-01-01
Supplement: d2cc03131k1.pdf [file d2cc03131k1.pdf]

## Supporting Information

# Ancillary Ligands Tuned Ti(IV)-based Metallocalixarene Coordination Cages for Photocatalytic H<sub>2</sub> Evolution

Yi-Qi Tian,<sup>a‡</sup> Yun-Shu Cui,<sup>b‡</sup> Jia Hui-Zhu,<sup>a</sup> Cong-Qiao Xu,<sup>b\*</sup> Xiao-Yi Yi,<sup>a</sup> Jun Li<sup>b,c</sup> and Chao Liu<sup>a\*</sup>

<sup>a</sup> Hunan Provincial Key Laboratory of Chemical Power Sources, College of Chemistry and Chemical Engineering, Central South University, Changsha 410083, Hunan, P. R. China

<sup>b</sup> Department of Chemistry, Southern University of Science and Technology, Shenzhen 518055, P. R. China

<sup>c</sup> Department of Chemistry and Key Laboratory of Organic Optoelectronics & Molecular Engineering of Ministry of Education, Tsinghua University, 100084 Beijing, China

Corresponding Authors

\*(Chao Liu) E-mail: chaoliu@csu.edu.cn

<sup>†</sup>Y.-Q.T. and Y.-S.C. contributed equally to this work

## 1. Experimental Section

**Materials and Characterization.** All reagents were purchased commercially and were not further purified when used. Powder X-ray diffraction (PXRD) analysis were performed on a Rigaku Mini Flex II diffractometer at a 2θ range of 3–50° (5° min<sup>-1</sup>) with CuKα radiation (λ = 1.54056 Å). The solid-state UV/Vis spectra data of the cluster samples were obtained on UV-4000 spectrophotometer. Electrospray ionization mass spectrometry (ESI-MS) were performed on a Bruker Daltonik GmbH (Bruker, Germany). Thermogravimetric (TGA) patterns were recorded on a Mettler Toledo TGA/SDTA 851e analyzer in a N<sub>2</sub> atmosphere. FT-IR spectra using KBr pellets were taken on a Bruker Vertex 70 Spectrometer.

**Synthesis for compound {Ti(TBC[4])(O<sup>i</sup>Pr)}·HNEt<sub>3</sub>·2<sup>i</sup>PrOH {Ti-<sup>i</sup>PrOH}:** TBC[4] (21 mg, 0.032 mmol) were added in a 15mL reaction vessel with 3 mL isopropanol. Ti(O<sup>i</sup>Pr)<sub>4</sub> (100 μL, 0.33 mmol) and three drop triethylamine were added dropwise. The resulting mixtures were sonicated for 5 min, then were transferred to a preheated oven at 80 °C for 2 days. Yellow colored crystals were obtained after cooling to 25 °C in a yield of ~70%. Elem. Anal. Calcd for C<sub>53</sub>H<sub>74</sub>O<sub>5</sub>NTi (wt%): C, 74.62; H, 8.74; N, 1.64. Found: C, 73.91; H, 8.38; N, 1.31.

**Synthesis for compound {H<sub>2</sub>Ti<sub>2</sub>(TBC[4])<sub>2</sub>(MeO)<sub>2</sub>·4MeOH {Ti<sub>2</sub>-MeOH}:** TBC[4] (21 mg, 0.032 mmol) was added in a 15mL reaction vessel with 3 mL MeOH. Ti(O<sup>i</sup>Pr)<sub>4</sub> (100 μL, 0.33 mmol) was added dropwise. The resulting mixtures were sonicated for 5 min, then were transferred to a preheated oven at 80 °C for 2 days. Yellow colored crystals were obtained after cooling to 25 °C in a yield of ~70%. Anal. Calcd for C<sub>90</sub>H<sub>110</sub>O<sub>10</sub>Ti<sub>2</sub> (wt%): C, 74.67; H, 7.66. Found: C, 73.82; H, 7.29.

**Synthesis for compound {Ti<sub>4</sub>O<sub>2</sub>(O<sup>i</sup>Pr)<sub>4</sub>(DMF)<sub>2</sub>(TBC[4])<sub>2</sub> {Ti<sub>4</sub>-DMF}:** TBC[4] (21 mg, 0.032 mmol) were added in a 15mL reaction vessel with 3 mL DMF. Ti(O<sup>i</sup>Pr)<sub>4</sub> (100 μL, 0.33 mmol) was added dropwise. The resulting mixtures were then transferred to a preheated oven at 80 °C for 2 days. Yellow colored crystals were obtained after cooling to 25 °C in a yield of ~85%. Anal. Calcd for C<sub>106</sub>H<sub>142</sub>N<sub>2</sub>O<sub>16</sub>Ti<sub>4</sub> (wt%): C, 67.29; H, 7.56; N, 1.48. Found: C, 67.85; H, 7.23; N, 1.69.

**Synthesis for compound {H<sub>2</sub>Ti<sub>4</sub>O<sub>2</sub>(EtO)<sub>6</sub>(TBC[4])<sub>2</sub> {Ti<sub>4</sub>-EtOH}:** TBC[4] (21 mg, 0.032 mmol) were added in a 15mL reaction vessel with 3 mL EtOH. Ti(O<sup>i</sup>Pr)<sub>4</sub> (100 μL, 0.33 mmol) was added dropwise. The resulting mixtures were then transferred to a preheated oven at 80 °C for 2 days. Yellow colored crystals were obtained after cooling to 25 °C in a yield of ~65%. Elem. Anal. Calcd for C<sub>100</sub>H<sub>138</sub>O<sub>16</sub>Ti<sub>4</sub>(wt%): C, 67.18; H, 7.78. Found: C, 67.56; H, 8.08.

**Synthesis for compound  $\{\text{Ti}_4\text{O}_2(\text{O}^i\text{Pr})_4(\text{TBC}[4])_2\} \{\text{Ti}_4\text{-}^i\text{PrOH}\}$ :** TBC[4] (21 mg, 0.032 mmol) were added in a 15mL reaction vessel with 3 mL  $^i\text{PrOH}$ .  $\text{Ti}(\text{O}^i\text{Pr})_4$  (100  $\mu\text{L}$ , 0.33 mmol) was added dropwise. The resulting mixtures were then transferred to a preheated oven at 80 °C for 2 days. Yellow colored crystals were obtained after cooling to 25 °C in a yield of ~65%. Elem. Anal. Calcd for  $\text{C}_{100}\text{H}_{132}\text{O}_{14}\text{Ti}_4(\text{wt}\%)$ : C, 68.65; H, 7.60. Found: C, 68.26; H, 8.11.

**Synthesis for compound  $\{\text{Ti}_{12}(\text{O}^i\text{Pr})_{12}(\text{TBC}[4])_6(\text{Pdc})_6\} \cdot 14\text{CH}_3\text{CN} \{\text{Ti}_{12}\text{L}_6\text{-1}\}$ :** TBC[4] (30 mg, 0.046 mmol) and 3,5-pyridinedicarboxylic acid ( $\text{H}_2\text{Pdc}$ , 16.7 mg, 0.1 mmol) were added in a 15mL reaction vessel with 3 mL  $\text{CH}_3\text{CN}$ .  $\text{Ti}(\text{O}^i\text{Pr})_4$  (100  $\mu\text{L}$ , 0.33 mmol) was added dropwise. The resulting mixtures were then transferred to a preheated oven at 80 °C for 3 days. Red colored crystals were obtained after cooling to 25 °C in a yield of ~55%. Elem. Anal. Calcd for  $\text{C}_{358}\text{H}_{438}\text{N}_{14}\text{O}_{60}\text{Ti}_{12}(\text{wt}\%)$ : C, 66.43; H, 6.82; N, 3.02. Found: C, 67.35; H, 7.32; N, 3.52.

**Synthesis for compound  $\{\text{Ti}_{12}(\text{O}^i\text{Pr})_{12}(\text{TBC}[4])_6(\text{Pip})_6\} \cdot 34\text{CH}_3\text{CN} \{\text{Ti}_{12}\text{L}_6\text{-2}\}$ :** TBC[4] (42 mg, 0.065 mmol) and 5-(pyridin-4-yl)isophthalate ( $\text{H}_2\text{Pip}$ , 100 mg, 0.4 mmol) were sealed in a 25mL Teflon-lined reaction vessel with 5 mL  $\text{CH}_3\text{CN}$ .  $\text{Ti}(\text{O}^i\text{Pr})_4$  (100  $\mu\text{L}$ , 0.33 mmol) was added dropwise. The resulting mixtures were then transferred to a preheated oven at 100 °C for 3 days. Red colored crystals were obtained after cooling to 25 °C in a low yield of ~5%.  $\{\text{Ti}_{12}\text{L}_6\text{-2}\}$  has a low yield and coexists with other impurities. We can only manually pick a small number of crystals to do some basic characterization.

**Photocurrent responses.** Photoelectrochemical tests were carried out on a CHI 660E electrochemical workstation. The platinum plate was used as the counter electrode, and the saturated calomel electrode was used as the reference electrode. 5 mg crystal samples were ultrasonically dispersed in 1 ml ethanol, and then the dispersion was dropped on FTO glass to prepare the working electrode. The electrodes were immersed in the 0.2 M  $\text{Na}_2\text{SO}_4$  aqueous solution. A 300 W Xe lamp with UV cut-off filter was used as a full-wavelength light source.

**Contact Angle Measurements.** Contact angles were measured on powder samples using a contact angle meter with a rotatable substrate holder. To perform contact angle measurements, 10 mg of powder samples of the clusters were deposited on a glass substrate bed. Then, powders were pressed to make a flat surface by the glass slide. A 10  $\mu\text{L}$  water droplet was released slowly on the flat surface of the powder samples. The droplet image was taken by a high-performance charge-coupled device (CCD) sensor. The contact angle of all powder samples was analyzed by five-point simulation analysis.

**$\text{H}_2$  Production Experiment.** Photocatalytic hydrogen production tests were investigated in a closed gas circulation system (Beijing Perfect Light Co. Labsolar-III (AG)). Typically, 25 mg of cluster sample was dispersed in 30 mL of  $\text{H}_2\text{O}$  with 5 mL of triethanolamine (TEOA) as a sacrificial agent, and then 33  $\mu\text{L}$  of 1.0 wt %  $\text{H}_2\text{PtCl}_6$  was added. A 300 W Xe lamp was used as the UV-vis light source. Light passed through a UV cutoff filter ( $\lambda > 420$  nm), and then the filtered light was focused onto the reactor. During irradiation, the headspace gas of the reactor was intermittently sampled every 30 min and  $\text{H}_2$  from the headspace gas was monitored by a gas chromatograph (Shimadzu GC9860) equipped with a thermal conductivity detector, a 5A molecular sieve column, and Ar as carrier gas.

**Theoretical and Computational Method** Quantum chemistry calculations were performed using density functional theory (DFT). The generalized gradient approach with PBE exchange-correlation functional was adopted.<sup>1</sup> The uncontracted Slater TZP basis set was utilized for Ti atom and DZP basis sets for other elements in the calculations.<sup>2</sup> Frozen-core approximation was applied to [1s<sup>2</sup>] of O and [1s<sup>2</sup>-2p<sup>6</sup>] of Ti atoms. Scalar relativistic effect was accounted by zeroth order regular approximation (ZORA) approach.<sup>3</sup> All the calculations were done with ADF 2019.304 program.<sup>4</sup>

#### References:

1. J. P. Perdew, K. Burke, M. Ernzerhof. Generalized Gradient Approximation Made Simple. *Phys. Rev. Lett.*, 1996, 77, 3865-3868.
2. E. V. Lenthe, E. J. Baerends, Optimized Slater-type basis sets for the elements 1-118, *J. Comput. Chem.* 2003, 24(9), 1142-1156.
3. E. V. Lenthe, R. V. Leeuwen, E. J. Baerends, J. G. Snijders, Relativistic regular two - component Hamiltonians, *Int. J. Quantum Chem.* 1996, 57(3), 281-293.
4. G. te Velde, F. M. Bickelhaupt, E. J. Baerends, C. Fonseca Guerra, S. J. A. van Gisbergen, J. G. Snijders, T. Ziegler. *J. Comput. Chem.* Chemistry with ADF, 2001, 22(9), 931-967.

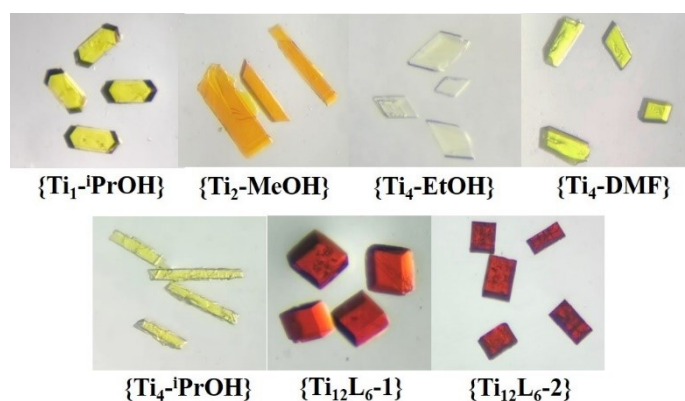

**Figure S1.** Pictures of fresh crystals separated from the solution.

## 2. Structure of Compounds

| Compounds                                                                   | {Ti-iPrOH}                                         | {Ti <sub>2</sub> -MeOH}                                          | {Ti <sub>4</sub> -DMF}                                                           | {Ti <sub>4</sub> -EtOH}                                           |
|-----------------------------------------------------------------------------|----------------------------------------------------|------------------------------------------------------------------|----------------------------------------------------------------------------------|-------------------------------------------------------------------|
| CCDC                                                                        | <b>2101662</b>                                     | <b>2101663</b>                                                   | <b>2101664</b>                                                                   | <b>2101665</b>                                                    |
| Formula                                                                     | C <sub>60</sub> H <sub>91</sub> NO <sub>7</sub> Ti | C <sub>94</sub> H <sub>126</sub> O <sub>14</sub> Ti <sub>2</sub> | C <sub>106</sub> H <sub>142</sub> N <sub>2</sub> O <sub>16</sub> Ti <sub>4</sub> | C <sub>100</sub> O <sub>16</sub> H <sub>138</sub> Ti <sub>4</sub> |
| T(K)                                                                        | 150                                                | 150                                                              | 150                                                                              | 150                                                               |
| <i>F<sub>w</sub></i>                                                        | 986.23                                             | 1575.74                                                          | 1891.81                                                                          | 1783.66                                                           |
| Crystal system                                                              | monoclinic                                         | monoclinic                                                       | triclinic                                                                        | triclinic                                                         |
| Space group                                                                 | P2 <sub>1</sub> /c                                 | P2 <sub>1</sub> /n                                               | P-1                                                                              | P-1                                                               |
| <i>a</i> , Å                                                                | 18.6310(2)                                         | 19.8135(4)                                                       | 12.37700(10)                                                                     | 12.0088(4)                                                        |
| <i>b</i> , Å                                                                | 12.8546(2)                                         | 22.9853(4)                                                       | 12.6781(2)                                                                       | 12.1232(4)                                                        |
| <i>c</i> , Å                                                                | 25.6170(3)                                         | 23.1531(4)                                                       | 19.3873(2)                                                                       | 18.4541(5)                                                        |
| <i>α</i> /°                                                                 | 90                                                 | 90                                                               | 90.5700(10)                                                                      | 80.451(3)                                                         |
| <i>β</i> /°                                                                 | 96.7860(10)                                        | 102.0212(17)                                                     | 105.9730(10)                                                                     | 76.371(3)                                                         |
| <i>γ</i> /°                                                                 | 90                                                 | 90                                                               | 114.5140(10)                                                                     | 65.491(3)                                                         |
| <i>V</i> /Å <sup>3</sup>                                                    | 6092.14(14)                                        | 10313.1(3)                                                       | 2634.17(6)                                                                       | 2368.67(15)                                                       |
| <i>Z</i>                                                                    | 4                                                  | 4                                                                | 1                                                                                | 1                                                                 |
| <i>ρ</i> <sub>calcd</sub> /gcm <sup>-3</sup> )                              | 0.930                                              | 0.932                                                            | 1.195                                                                            | 1.250                                                             |
| <i>μ</i> /mm <sup>-1</sup> )                                                | 1.471                                              | 1.668                                                            | 2.978                                                                            | 3.274                                                             |
| <i>F</i> (000)                                                              | 1844                                               | 3096.0                                                           | 1012.0                                                                           | 950.0                                                             |
| Data/restraints/parameters                                                  | 12707/153/674                                      | 21636/231/1193                                                   | 10672/166/786                                                                    | 9191/136/725                                                      |
| Goof                                                                        | 1.065                                              | 1.029                                                            | 1.042                                                                            | 1.075                                                             |
| <i>R</i> <sub>1</sub> / <i>wR</i> <sub>2</sub> ( <i>I</i> > 2σ( <i>I</i> )) | 0.0764/0.2378                                      | 0.0648/0.1852                                                    | 0.0537/0.1498                                                                    | 0.0541/0.1380                                                     |
| <i>R</i> <sub>1</sub> / <i>wR</i> <sub>2</sub> (all data)                   | 0.0876/0.2561                                      | 0.0842/0.2004                                                    | 0.0665/0.1568                                                                    | 0.0765/0.1518                                                     |

| Compounds            | {Ti <sub>4</sub> -iPrOH}                                          | {Ti <sub>12</sub> L <sub>6</sub> -1}                                               | {Ti <sub>12</sub> L <sub>6</sub> -2}                                               |
|----------------------|-------------------------------------------------------------------|------------------------------------------------------------------------------------|------------------------------------------------------------------------------------|
| CCDC                 | <b>2101666</b>                                                    | <b>2101668</b>                                                                     | <b>2101669</b>                                                                     |
| Formula              | C <sub>100</sub> H <sub>132</sub> O <sub>14</sub> Ti <sub>4</sub> | C <sub>370</sub> H <sub>456</sub> N <sub>20</sub> O <sub>60</sub> Ti <sub>12</sub> | C <sub>443</sub> H <sub>533</sub> N <sub>40</sub> O <sub>60</sub> Ti <sub>12</sub> |
| T(K)                 | 150.1                                                             | 150.1                                                                              | 150.1                                                                              |
| <i>F<sub>w</sub></i> | 1749.65                                                           | 6718.32                                                                            | 7952.59                                                                            |
| Crystal system       | triclinic                                                         | trigonal                                                                           | monoclinic                                                                         |
| Space group          | P-1                                                               | R-3                                                                                | P2 <sub>1</sub> /c                                                                 |
| <i>a</i> , Å         | 15.0667(7)                                                        | 33.1580(13)                                                                        | 24.2214(6)                                                                         |
| <i>b</i> , Å         | 16.2142(8)                                                        | 33.1580(13)                                                                        | 21.6454(4)                                                                         |
| <i>c</i> , Å         | 21.1278(5)                                                        | 31.9101(17)                                                                        | 42.7779(8)                                                                         |
| <i>α</i> /°          | 98.6700(3)                                                        | 90                                                                                 | 90                                                                                 |
| <i>β</i> /°          | 102.6620(4)                                                       | 90                                                                                 | 97.4170(2)                                                                         |
| <i>γ</i> /°          | 101.7650(4)                                                       | 120                                                                                | 90                                                                                 |

|                                       |               |               |                 |
|---------------------------------------|---------------|---------------|-----------------|
| $V/\text{\AA}^3$                      | 4825.8(4)     | 30383(3)      | 22240.0(8)      |
| $Z$                                   | 2             | 3             | 2               |
| $\rho_{\text{calcd}}/\text{gcm}^{-3}$ | 1.204         | 1.061         | 1.053           |
| $\mu/\text{mm}^{-1}$                  | 3.188         | 0.286         | 2.233           |
| $F(000)$                              | 1864.0        | 10284.0       | 7462.0          |
| Data/restraints/parameters            | 18948/67/1158 | 13149/105/758 | 39089/1048/2660 |
| Goof                                  | 1.002         | 0.974         | 1.267           |
| $R_1/wR_2(I > 2\sigma(I))$            | 0.0751/0.1832 | 0.0733/0.1857 | 0.1058/0.3227   |
| $R_1/wR_2(\text{all data})$           | 0.1463/0.2262 | 0.1211/0.2079 | 0.1249/0.3413   |

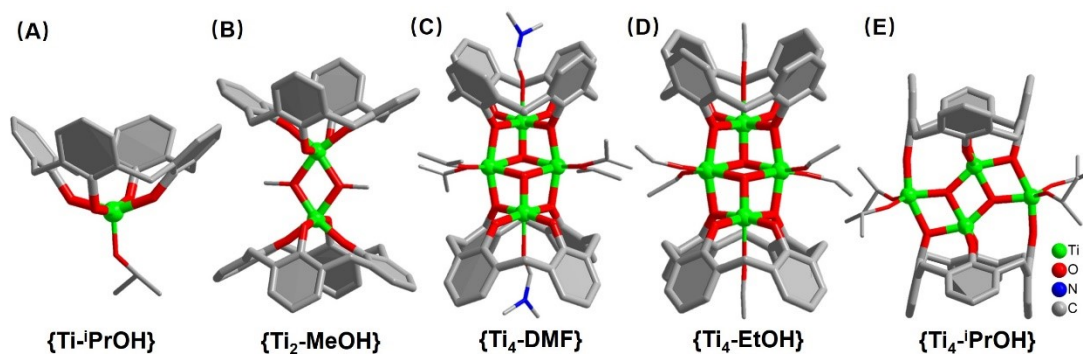

**Figure S2.** Structures of the simple TBC[4]-Ti clusters. The tert-butyl groups of TBC[4] ligands are deleted for brevity.

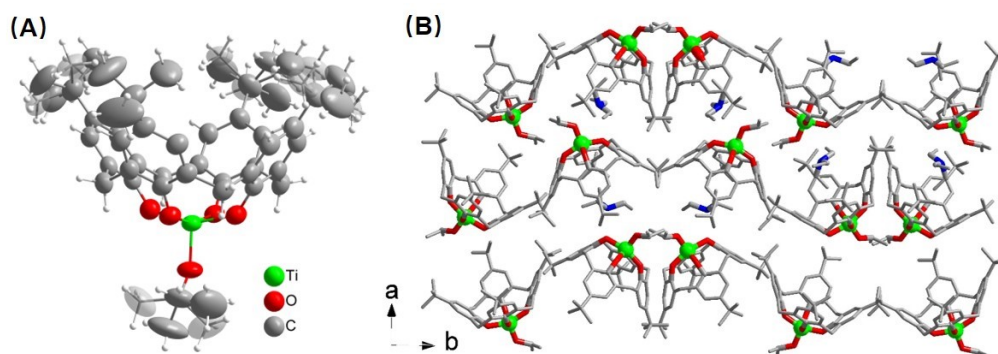

**Figure S3.** (A) ORTEP representation of the structure of {Ti-iPrOH}; (B) Three-dimensional packing structure of {Ti-iPrOH}.

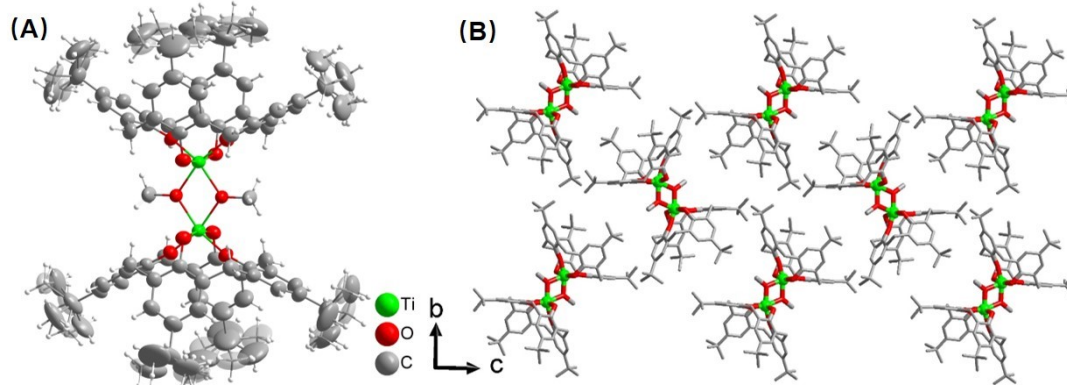

**Figure S4.** (A) ORTEP representation of the structure of {Ti<sub>2</sub>-MeOH}; (B) Three-dimensional packing structure of {Ti<sub>2</sub>-MeOH}.

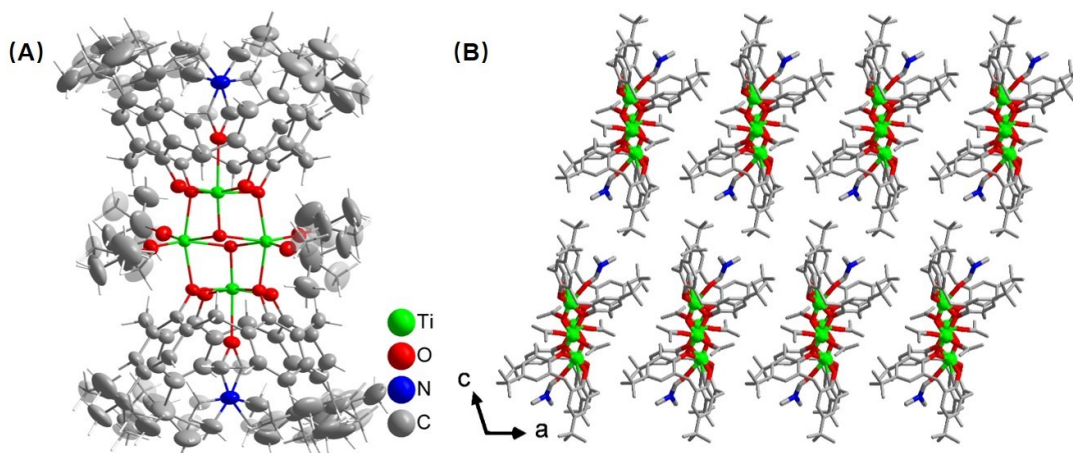

**Figure S5.** (A) ORTEP representation of the structure of  $\{\text{Ti}_4\text{-DMF}\}$ ; (B) Three-dimensional packing structure of  $\{\text{Ti}_4\text{-DMF}\}$ .

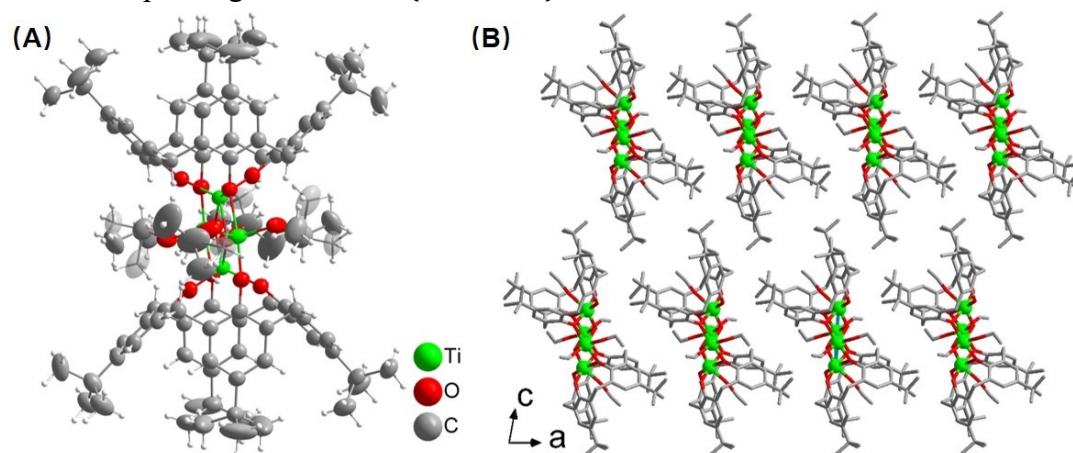

**Figure S6.** (A) ORTEP representation of the structure of  $\{\text{Ti}_4\text{-EtOH}\}$ ; (B) Three-dimensional packing structure of  $\{\text{Ti}_4\text{-EtOH}\}$ .

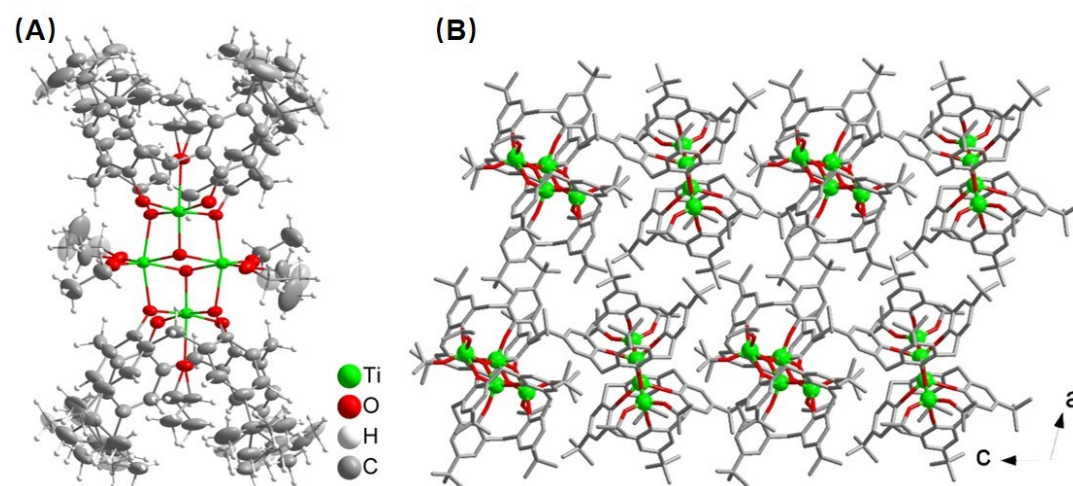

**Figure S7.** (A) ORTEP representation of the structure of  $\{\text{Ti}_4\text{-iPrOH}\}$ ; (B) Three-dimensional packing structure of  $\{\text{Ti}_4\text{-iPrOH}\}$ .

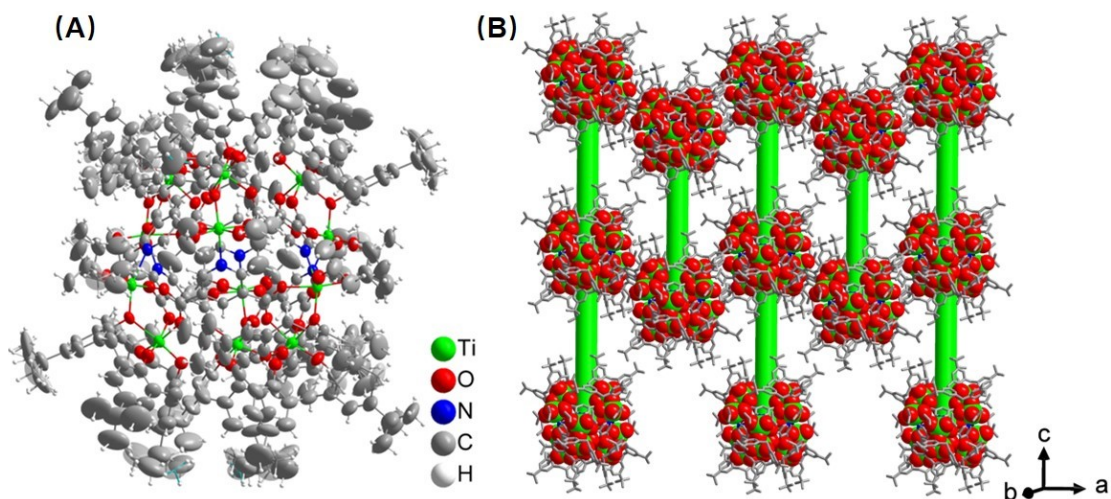

**Figure S8.** (A) ORTEP representation of the structure of  $\{\text{Ti}_{12}\text{L}_6\text{-1}\}$ ; (B) Three-dimensional packing structure of  $\{\text{Ti}_{12}\text{L}_6\text{-1}\}$ . The cages are stacked to form uniform nanotubes in a face-to-face fashion along the  $c$  direction.

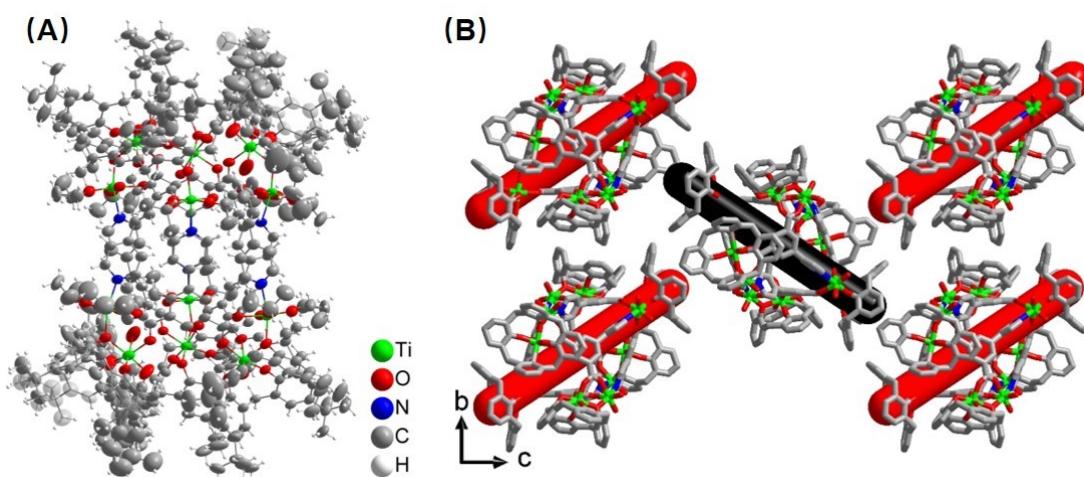

**Figure S9.** (A) ORTEP representation of the structure of  $\{\text{Ti}_{12}\text{L}_6\text{-2}\}$ ; (B) Three-dimensional packing structure of  $\{\text{Ti}_{12}\text{L}_6\text{-2}\}$ .

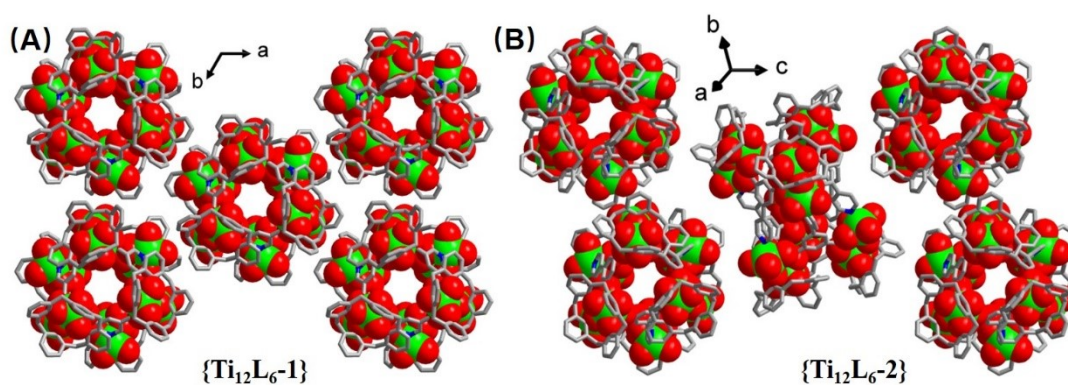

**Figure S10.** Comparison of stacking patterns of  $\{\text{Ti}_{12}\text{L}_6\text{-1}\}$ (A) and  $\{\text{Ti}_{12}\text{L}_6\text{-2}\}$ (B).

### 3. Powder X-ray Diffraction

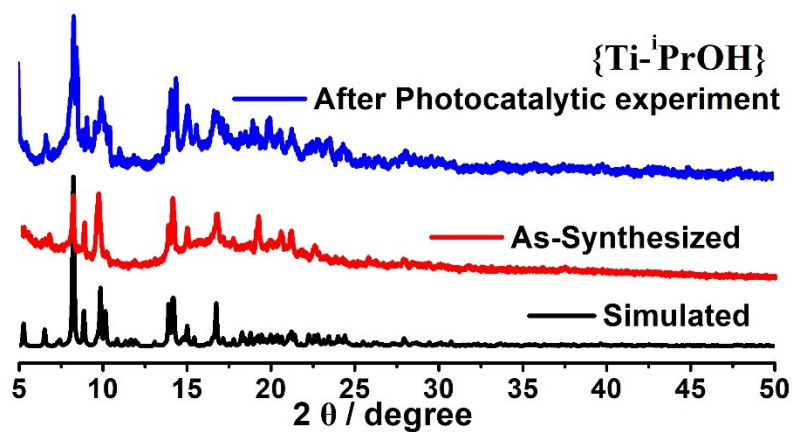

Figure S11. The XRD patterns of {Ti-iPrOH}.

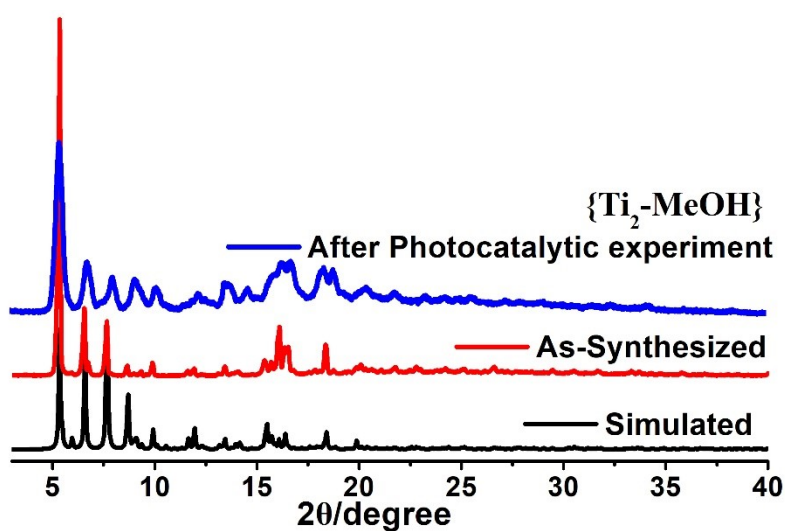

Figure S12. The XRD patterns of {Ti<sub>2</sub>-MeOH}.

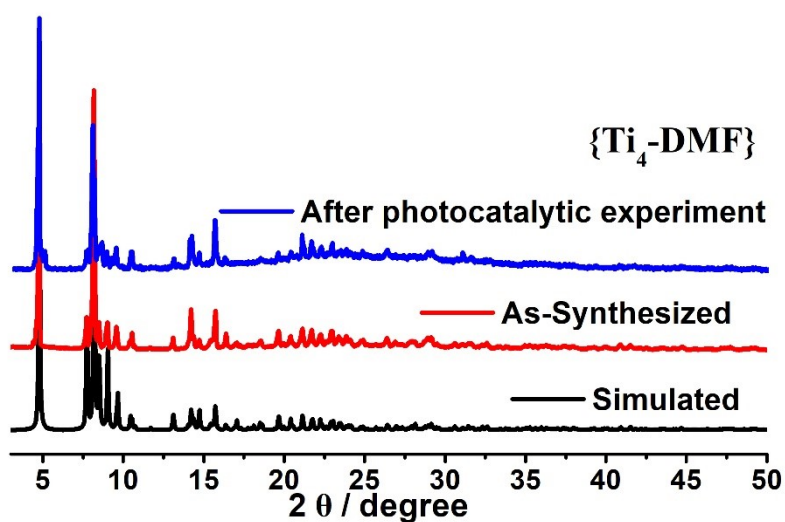

Figure S13. The XRD patterns of {Ti<sub>4</sub>-DMF}.

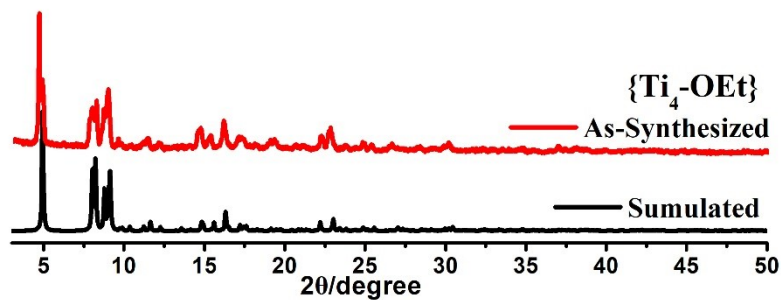

Figure S14. The XRD patterns of  $\{\text{Ti}_4\text{-EtOH}\}$ .

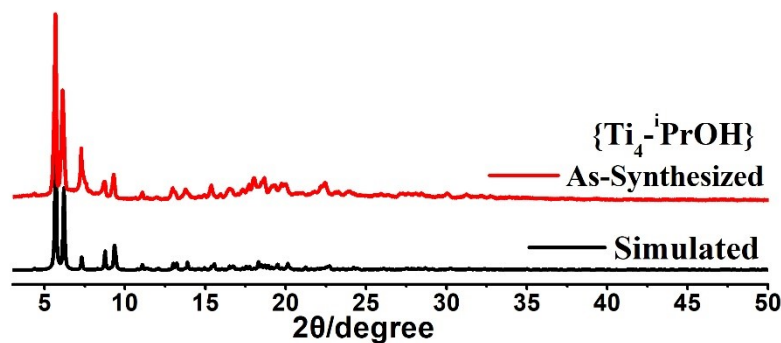

Figure S15. The XRD patterns of  $\{\text{Ti}_4\text{-}^i\text{PrOH}\}$ .

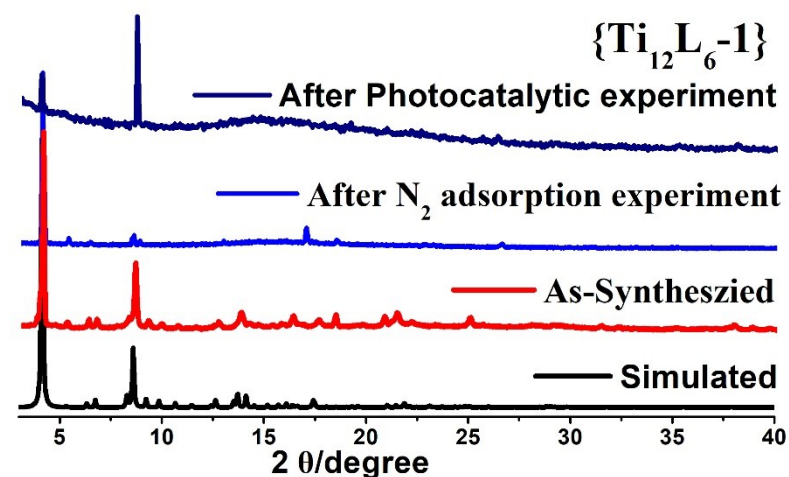

Figure S16. The XRD patterns of  $\{\text{Ti}_{12}\text{L}_6\text{-1}\}$ .

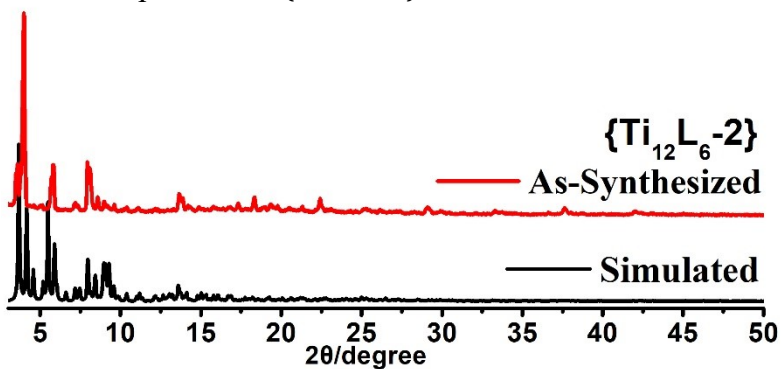

Figure S17. The XRD patterns of  $\{\text{Ti}_{12}\text{L}_6\text{-2}\}$ .



#### 4. XPS Tests

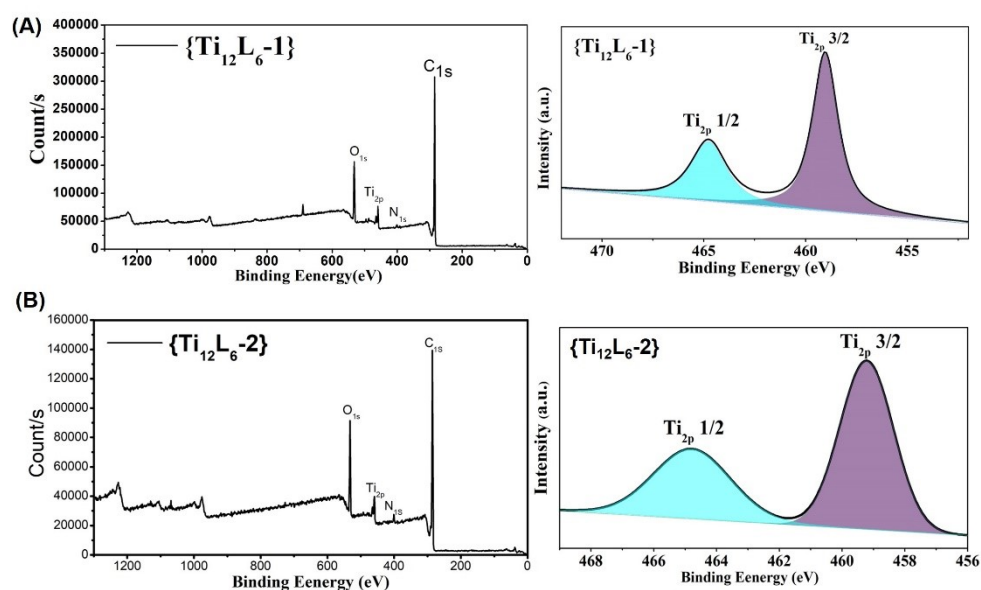

Figure S18. XPS tests of  $\{\text{Ti}_{12}\text{L}_6\text{-1}\}$  and  $\{\text{Ti}_{12}\text{L}_6\text{-2}\}$ .

#### 4. $\text{N}_2$ Sorption Isotherm.

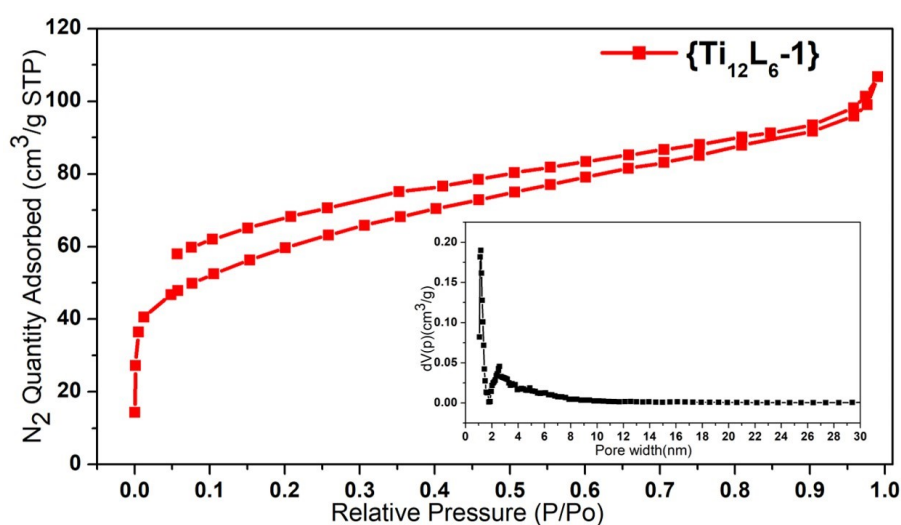

Figure S19.  $\text{N}_2$  sorption isotherms of  $\{\text{Ti}_{12}\text{L}_6\text{-1}\}$ .  $\{\text{Ti}_{12}\text{L}_6\text{-2}\}$  has a low yield (less than 5%) and coexists with other impurities. We can only manually pick a small number of crystals to do some basic characterization. However, at least 80 mg of samples are needed for BET experiments, and we cannot get so many samples.

## 6. Energy Dispersive X-ray (EDX) Spectroscopic Analysis

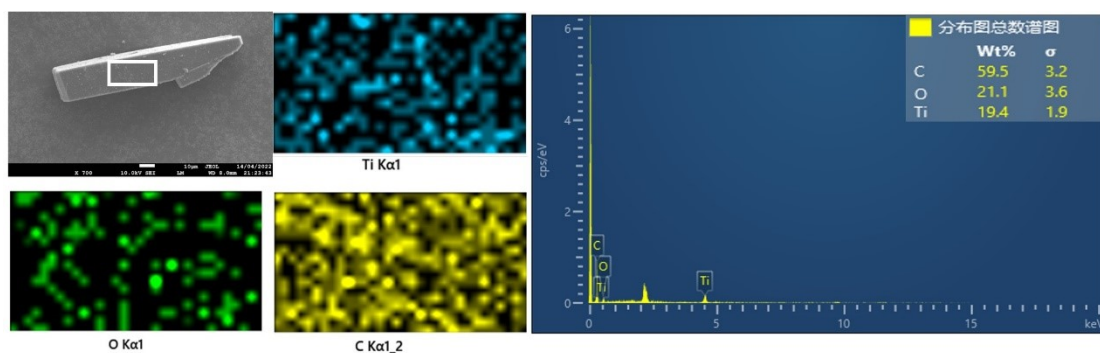

Figure S20. The EDS pattern of {Ti-*i*PrOH}.

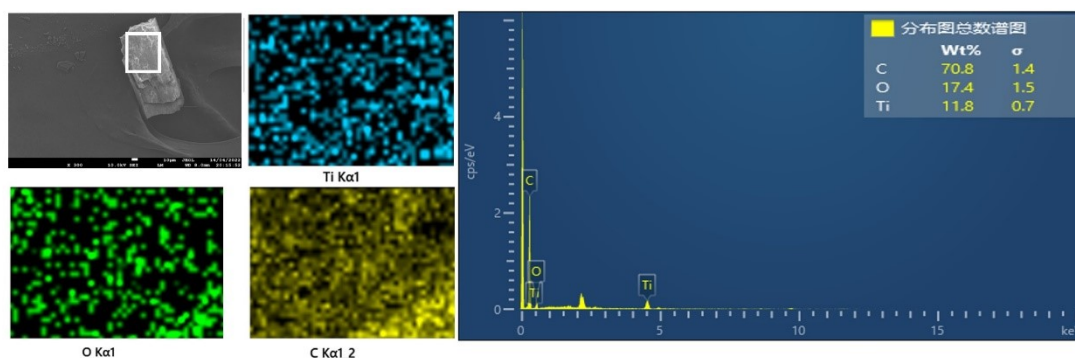

Figure S21. The EDS pattern of {Ti<sub>2</sub>-MeOH}.

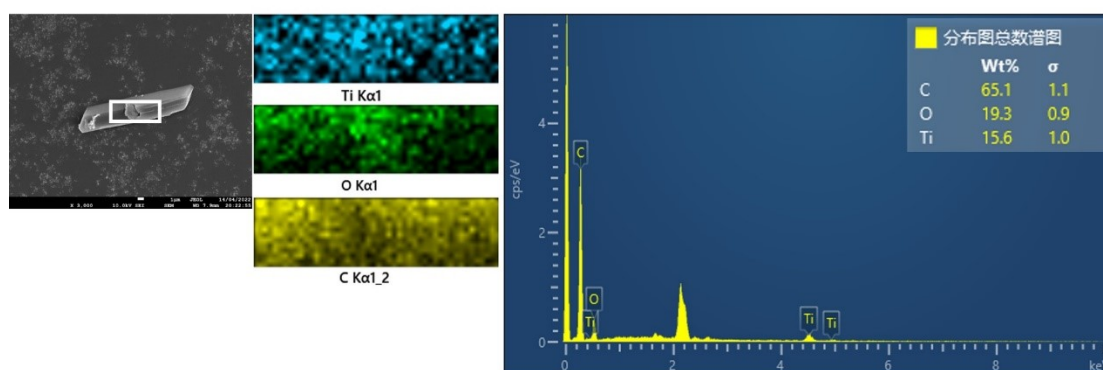

Figure S22. The EDS pattern of {Ti<sub>4</sub>-DMF}.

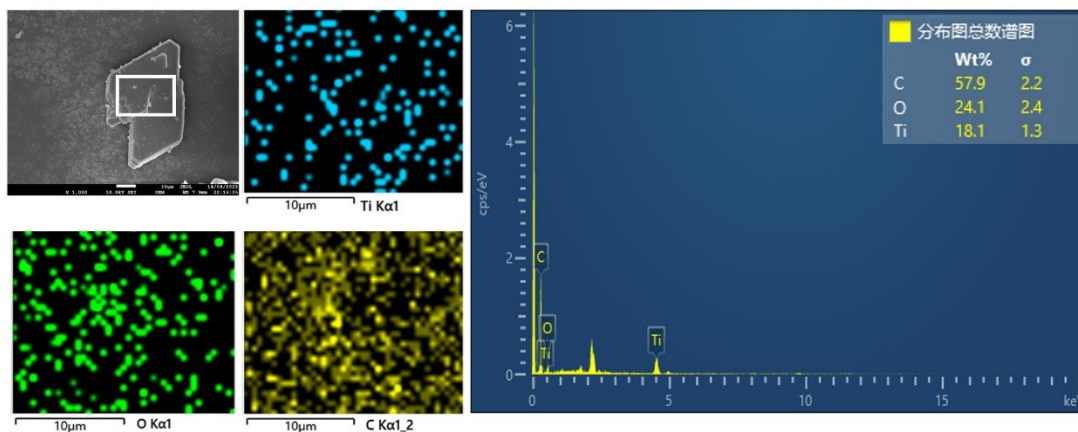

Figure S23. The EDS pattern of {Ti<sub>4</sub>-EtOH}.

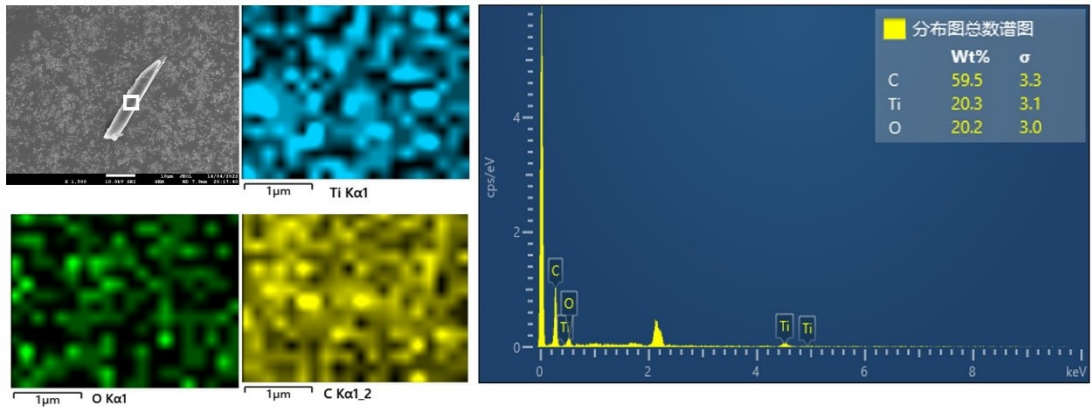

Figure S24. The EDS pattern of  $\{\text{Ti}_4\text{-iPrOH}\}$ .

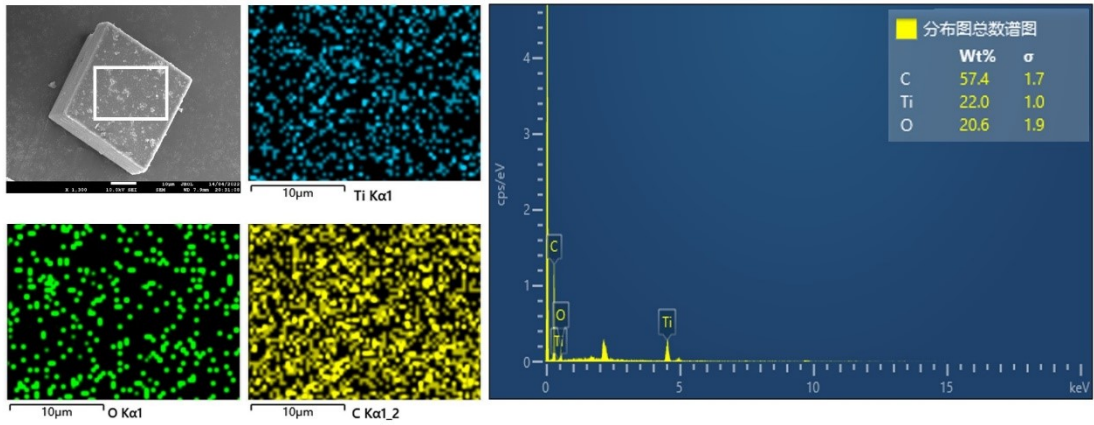

Figure S25. The EDS pattern of  $\{\text{Ti}_{12}\text{L}_6\text{-1}\}$ .

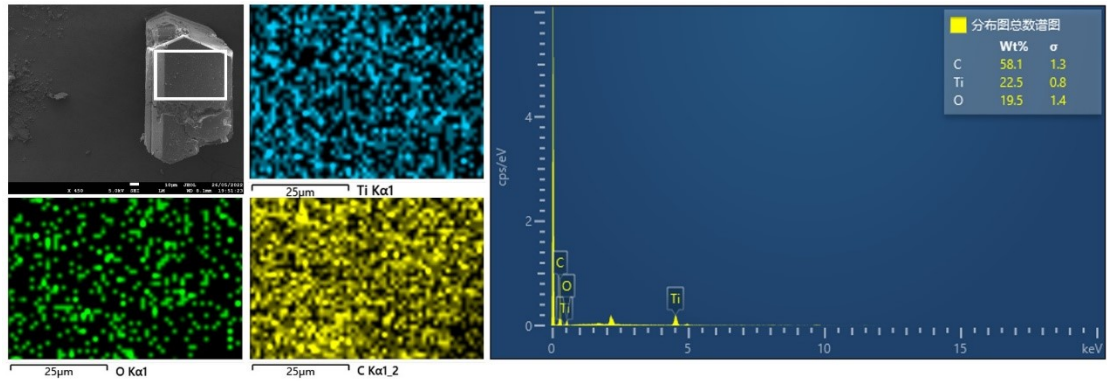

Figure S26. The EDS pattern of  $\{\text{Ti}_{12}\text{L}_6\text{-2}\}$ .

## 8. TG-Measurement

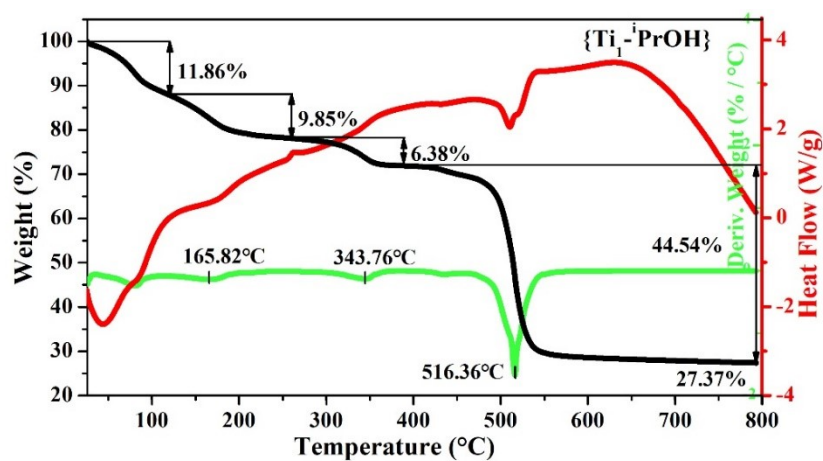

Figure S27. The TGA and DSC curves of {Ti<sub>1</sub>-iPrOH}.

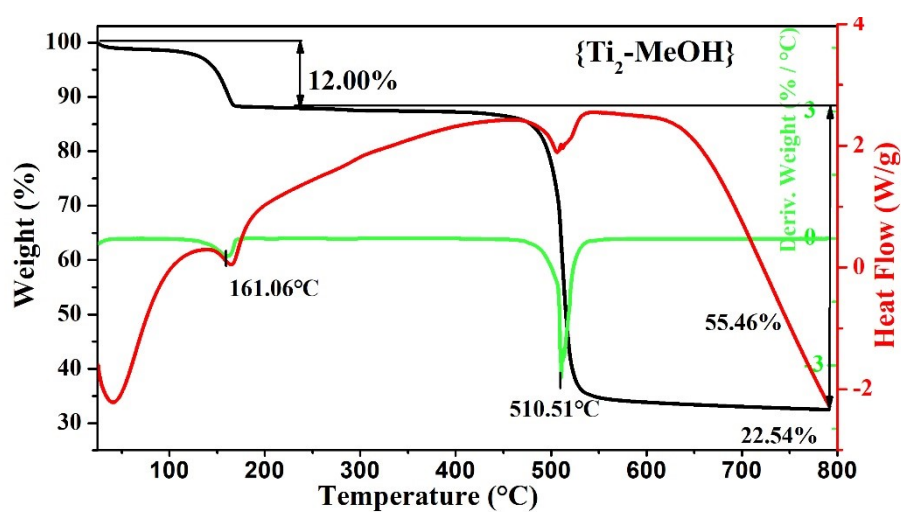

Figure S28. The TGA and DSC curves of {Ti<sub>2</sub>-MeOH}.

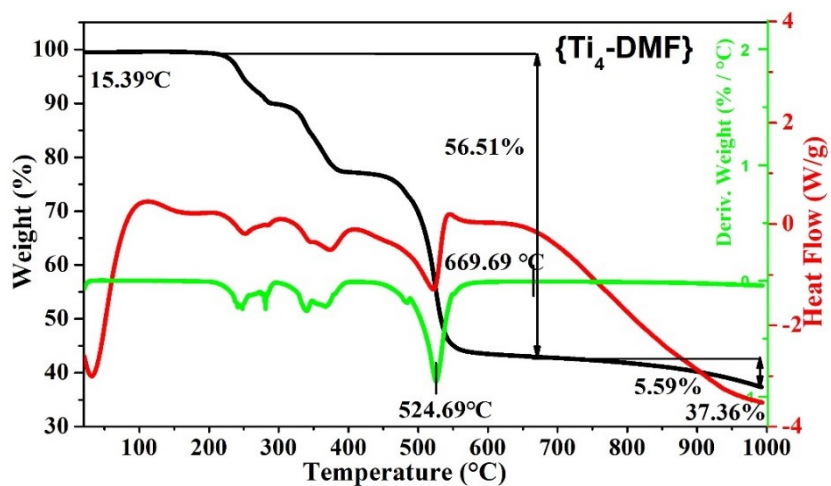

Figure S29. The TGA and DSC curves of {Ti<sub>4</sub>-DMF}.

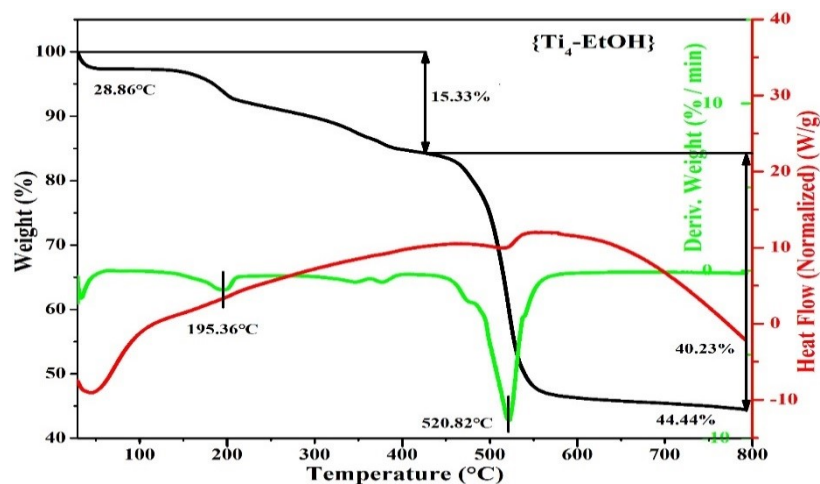

Figure S30. The TGA and DSC curves of  $\{\text{Ti}_4\text{-EtOH}\}$ .

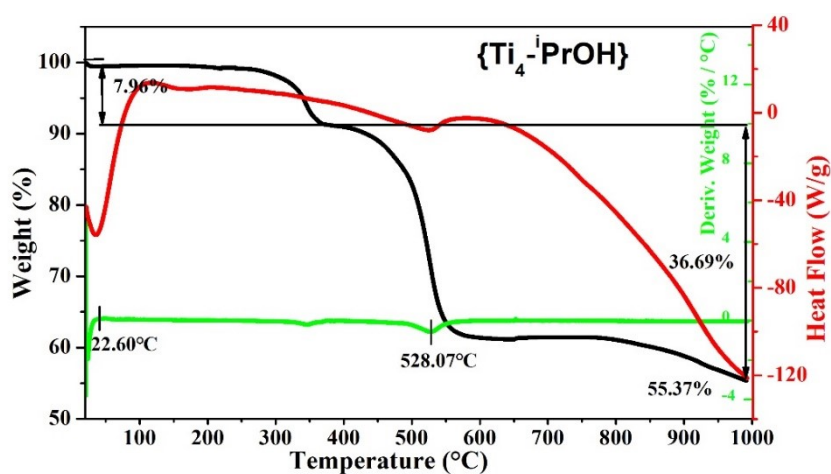

Figure S31. The TGA and DSC curves of  $\{\text{Ti}_4\text{-iPrOH}\}$ .

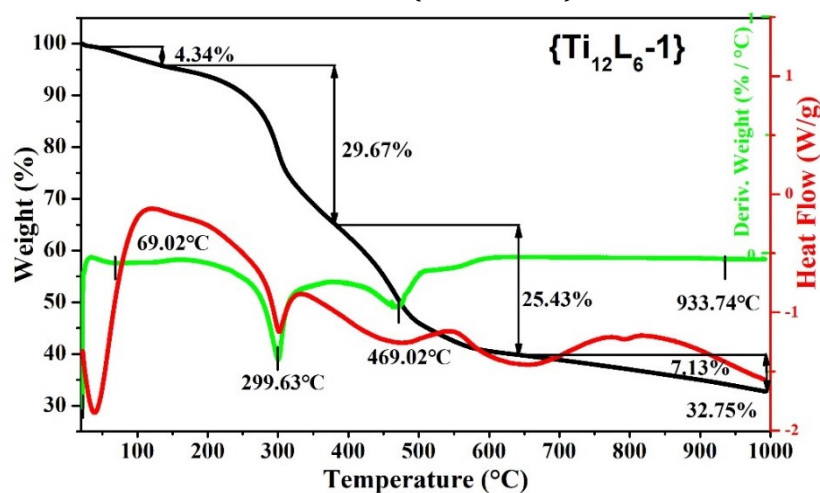

Figure S32. The TGA and DSC curves of  $\{\text{Ti}_{12}\text{L}_6\text{-1}\}$ .

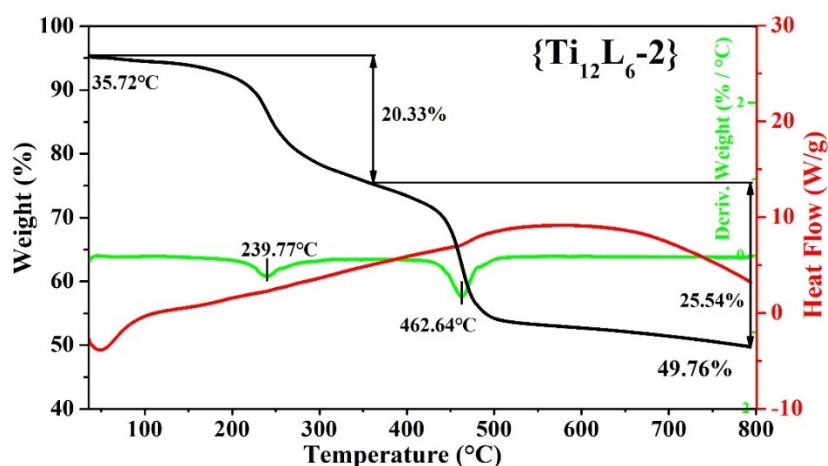

Figure S33. The TGA and DSC curves of  $\{\text{Ti}_{12}\text{L}_6\text{-2}\}$ .

## 7. IR Spectra

Figure S34-40 shows the FTIR spectra of clusters. The broad band between 3200-3500  $\text{cm}^{-1}$  attributable to OH stretching. The strong vibration band at ca. 1620-1650  $\text{cm}^{-1}$  can be ascribed to C=O stretching of the carboxyl. The characteristic bands of Ti-O-C and Ti-O-Ti appears in the ranges of 1000–1200 and 700–800  $\text{cm}^{-1}$ , respectively.

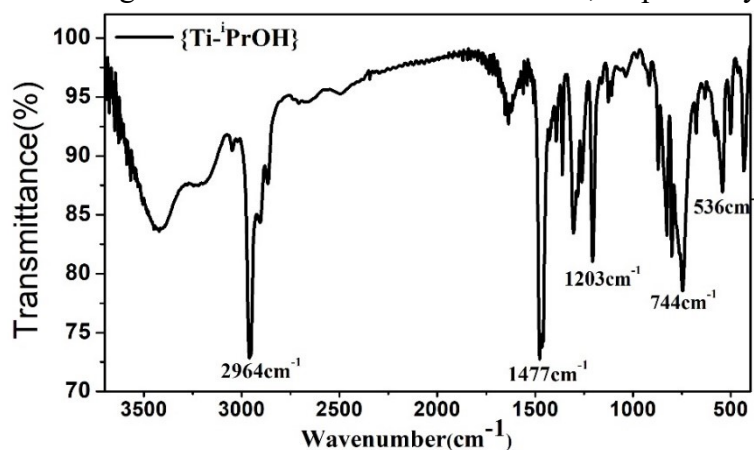

Figure S34. IR spectrum of crystal sample of  $\{\text{Ti-PrOH}\}$ .

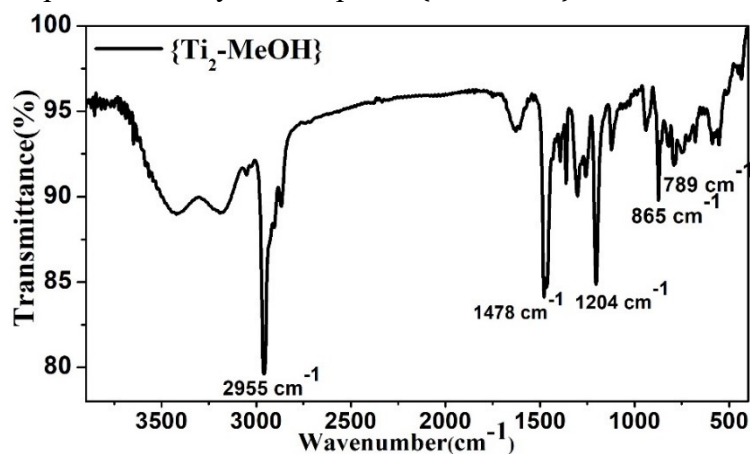

Figure S35. IR spectrum of crystal sample of  $\{\text{Ti}_2\text{-MeOH}\}$ .

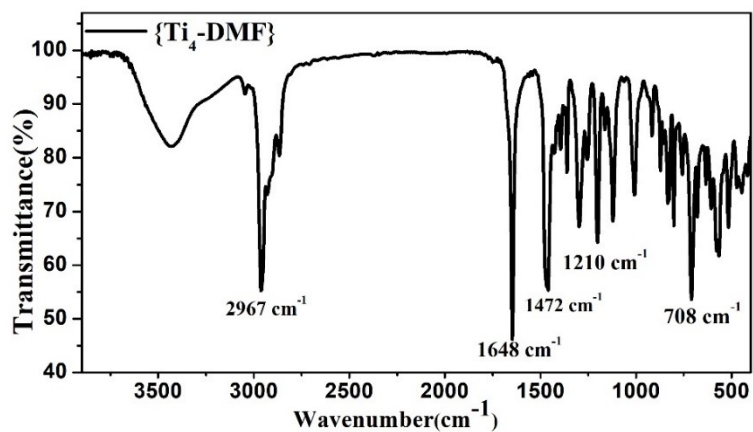

Figure S36. IR spectrum of crystal sample of  $\{\text{Ti}_4\text{-DMF}\}$ .

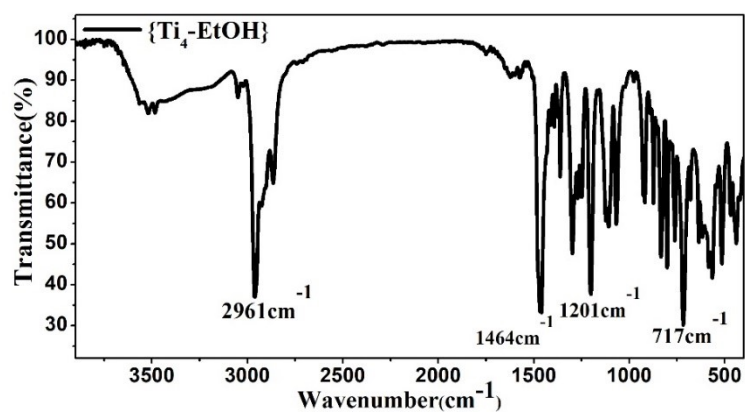

Figure S37. IR spectrum of crystal sample of  $\{\text{Ti}_4\text{-EtOH}\}$ .

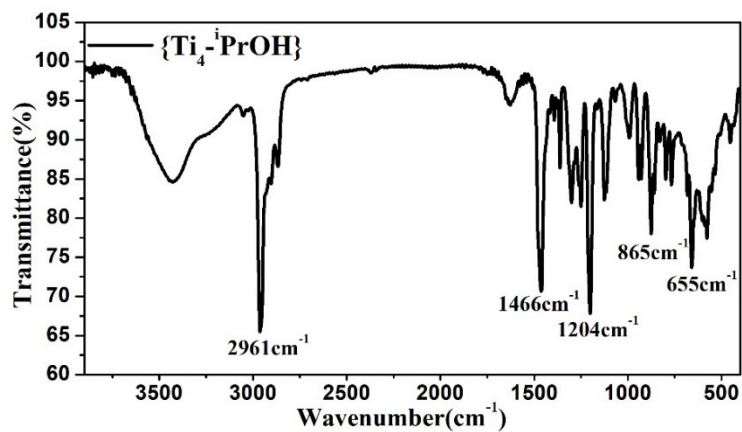

Figure S38. IR spectrum of crystal sample of  $\{\text{Ti}_4\text{-}^i\text{PrOH}\}$ .

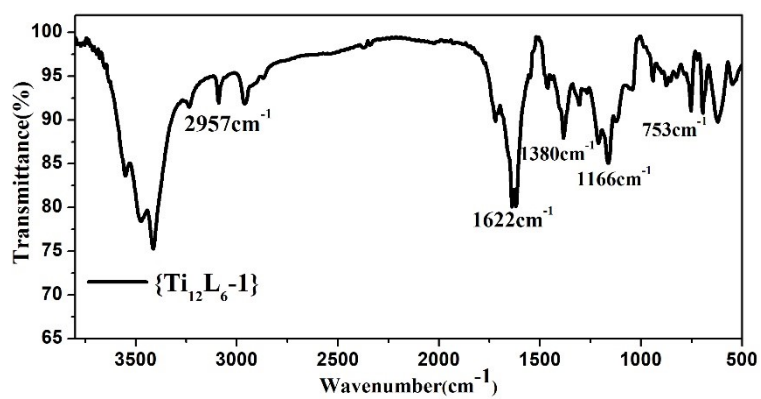

Figure S39. IR spectrum of crystal sample of  $\{\text{Ti}_{12}\text{L}_6\text{-1}\}$ .

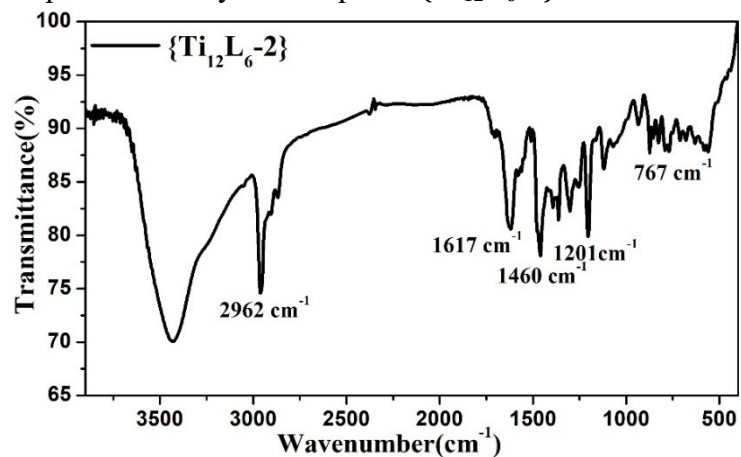

Figure S40. IR spectrum of crystal sample of  $\{\text{Ti}_{12}\text{L}_6\text{-2}\}$ .

## 8. Contact Angle Tests

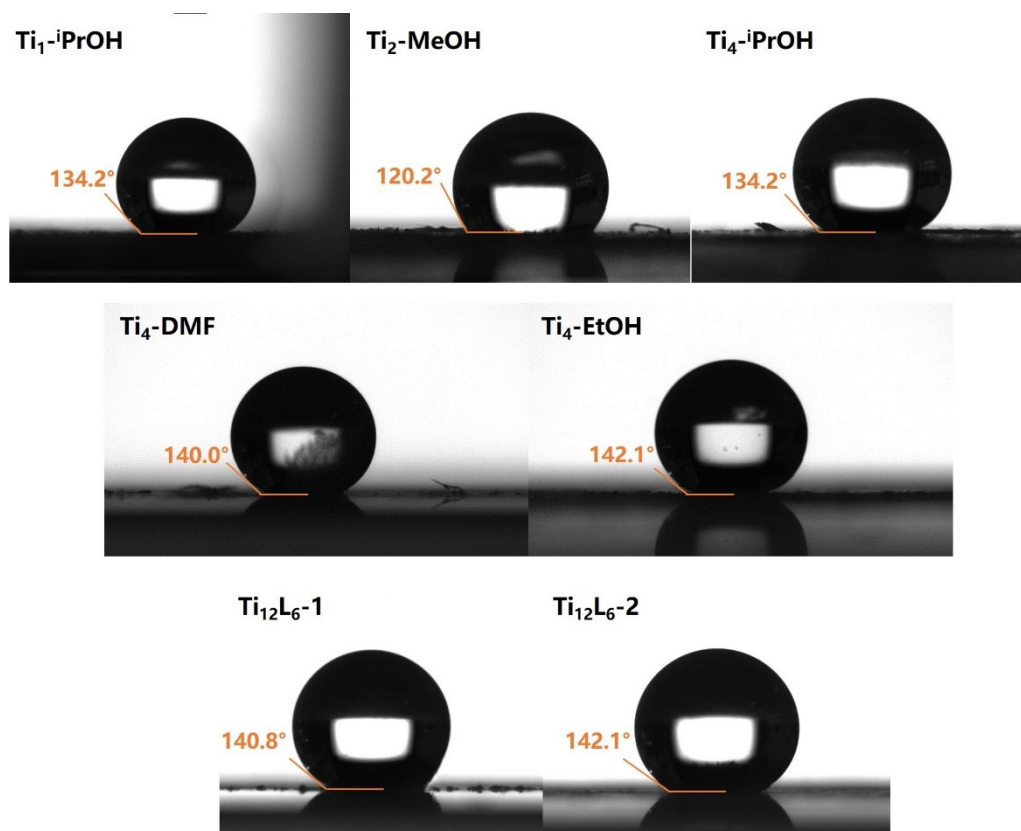

Figure S41. Contact angle pattern for the clusters and cages.



## 9. ESI-MS Measurements.

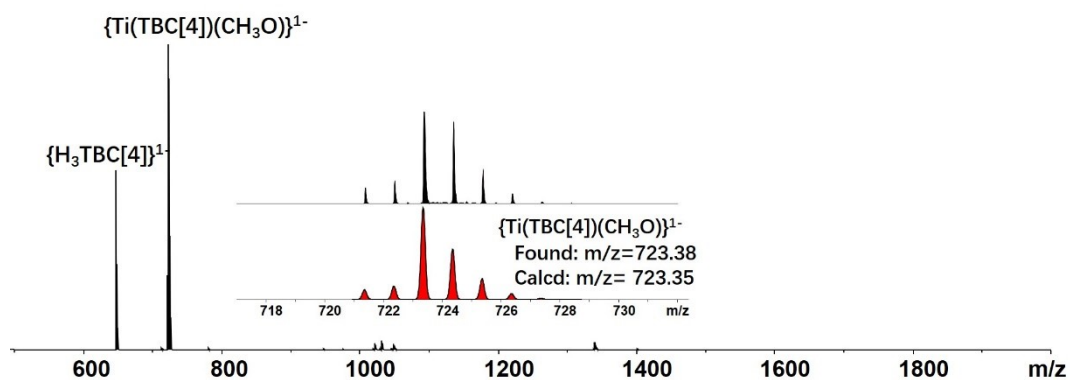

Figure S42. ESI-MS spectrum of the CH<sub>3</sub>OH solution of {Ti-*i*PrOH}.

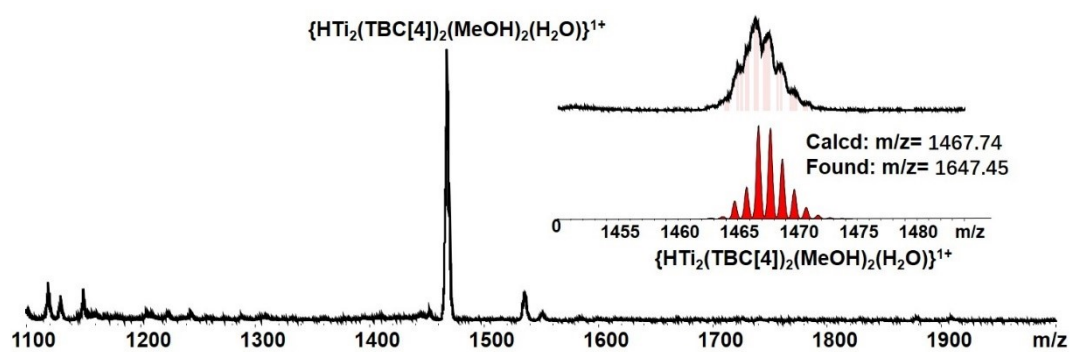

Figure S43. ESI-MS spectrum of the CH<sub>3</sub>OH solution of {Ti<sub>2</sub>-MeOH}.

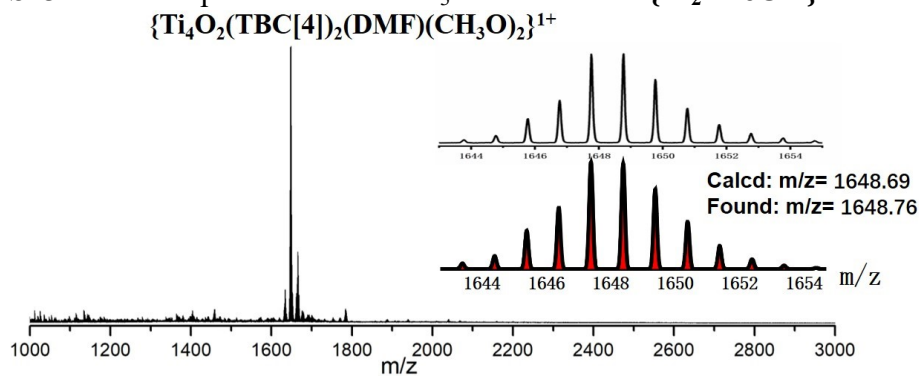

Figure S44. ESI-MS spectrum of the CH<sub>3</sub>OH solution of {Ti<sub>4</sub>-DMF}.

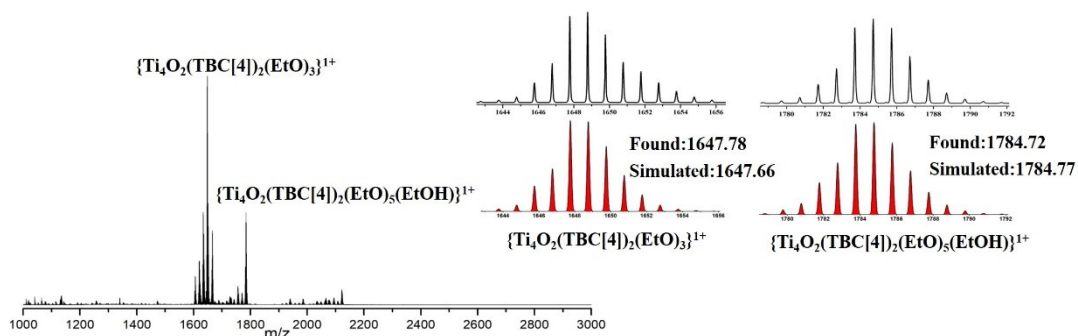

Figure S45. ESI-MS spectrum of the CH<sub>3</sub>OH solution of {Ti<sub>4</sub>-EtOH}.

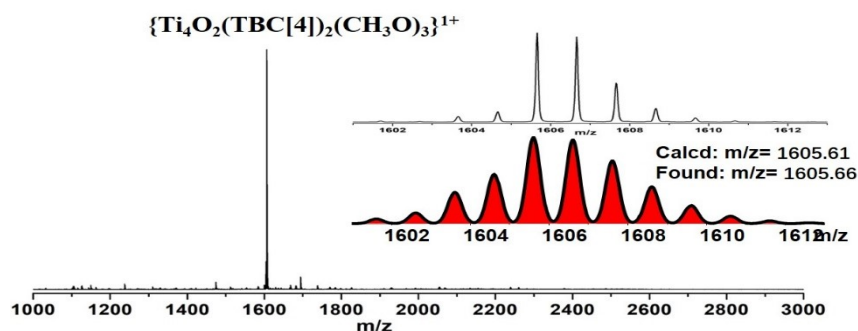

Figure S46. ESI-MS spectrum of the  $\text{CH}_3\text{OH}$  solution of  $\{\text{Ti}_4\text{-iPrOH}\}$ .

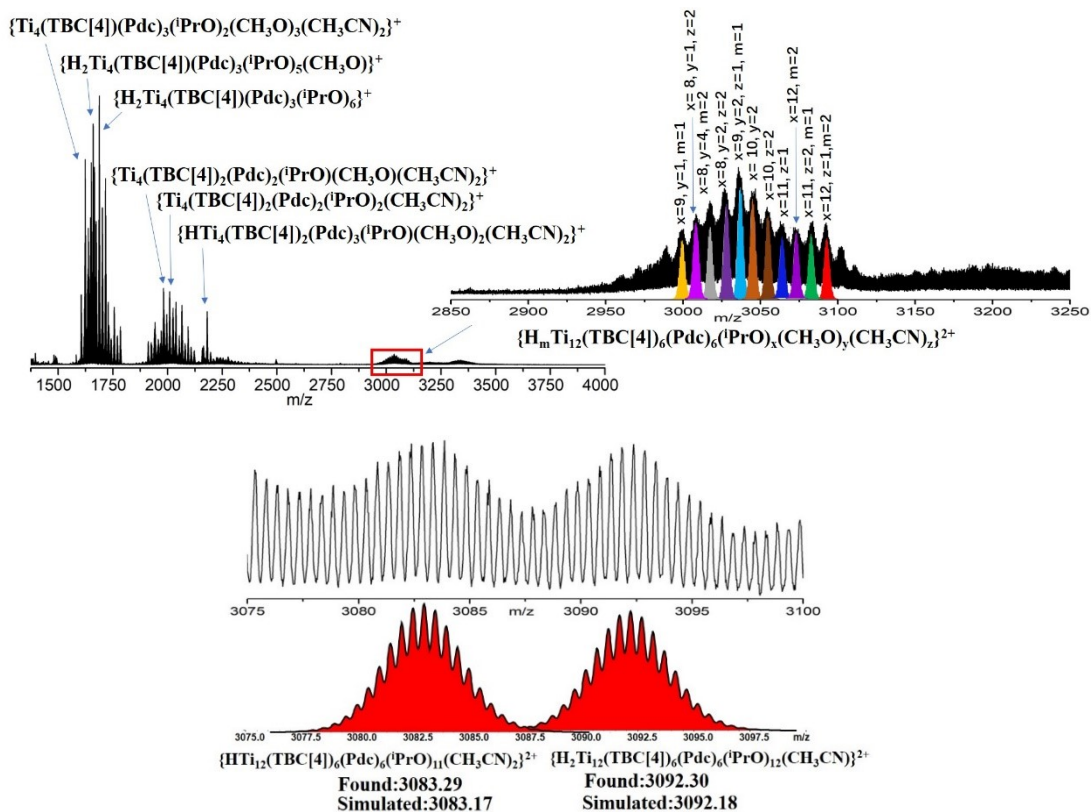

Figure S47. ESI-MS spectra of the  $\text{CH}_3\text{OH}$  solution of  $\{\text{Ti}_{12}\text{L}_6\text{-1}\}$ .

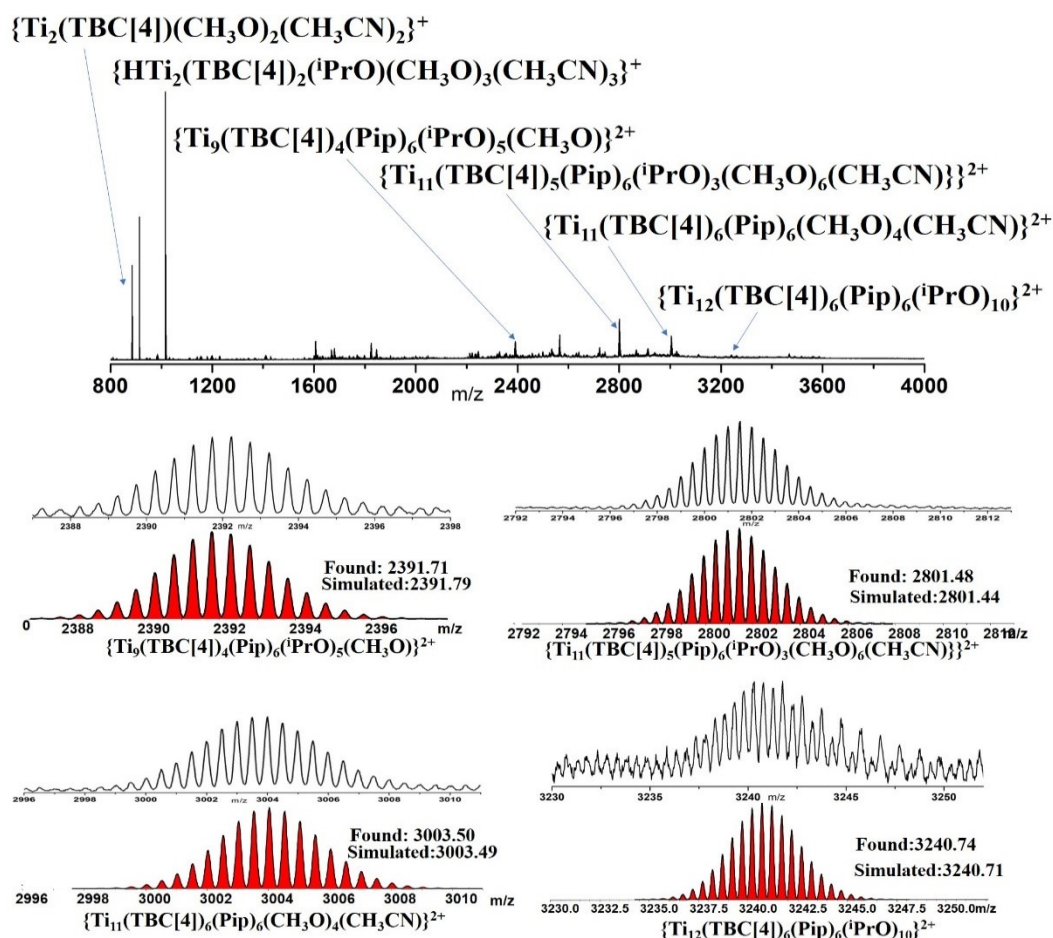

Figure S48. ESI-MS spectra of the  $\text{CH}_3\text{OH}$  solution of  $\{\text{Ti}_{12}\text{L}_6\text{-2}\}$ .

## 9. Band-gap investigation

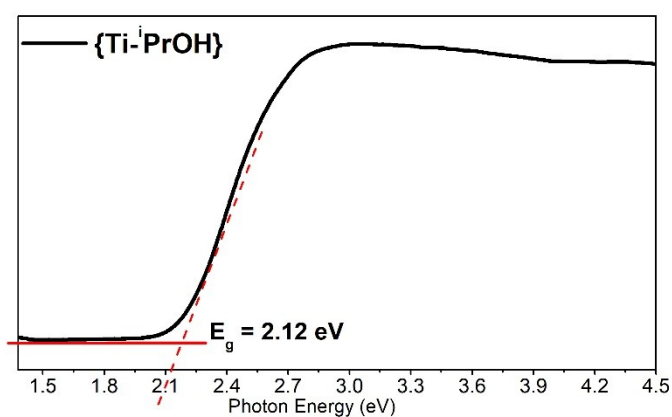

Figure 49. Kubelka–Munk transformation of diffuse reflectance data of  $\{\text{Ti}^{\text{iPrOH}}\}$ .

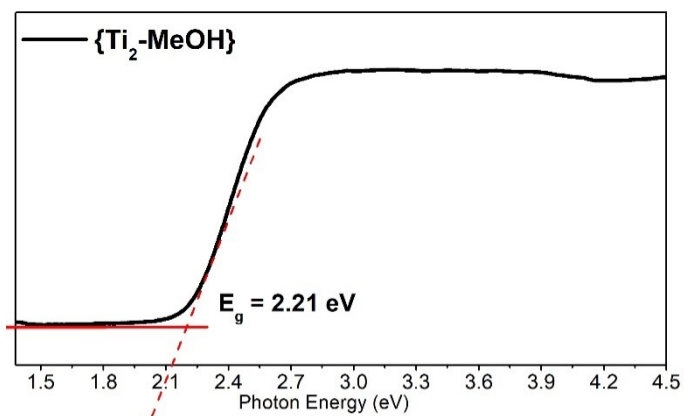

**Figure 50.** Kubelka–Munk transformation of diffuse reflectance data of  $\{\text{Ti}_2\text{-MeOH}\}$ .

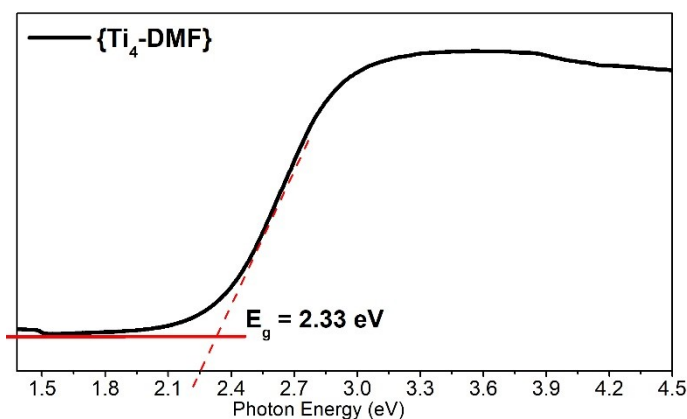

**Figure 51.** Kubelka–Munk transformation of diffuse reflectance data of  $\{\text{Ti}_4\text{-DMF}\}$ .

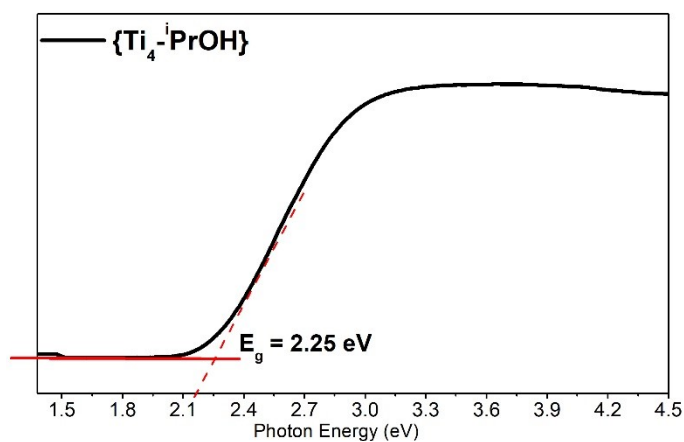

**Figure 52.** Kubelka–Munk transformation of diffuse reflectance data of  $\{\text{Ti}_4\text{-iPrOH}\}$ .

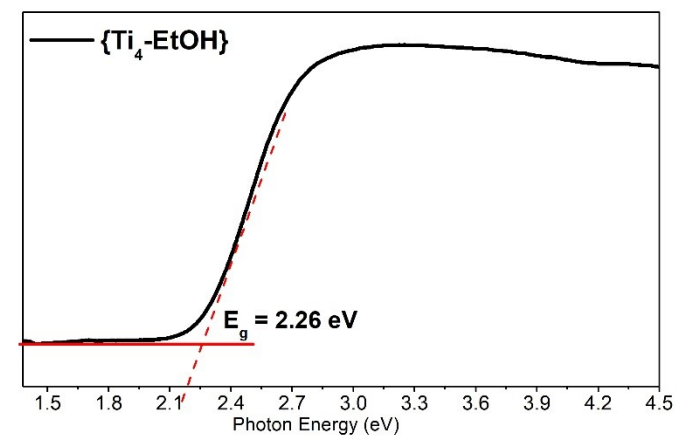

**Figure 53.** Kubelka–Munk transformation of diffuse reflectance data of  $\{\text{Ti}_4\text{-EtOH}\}$ .

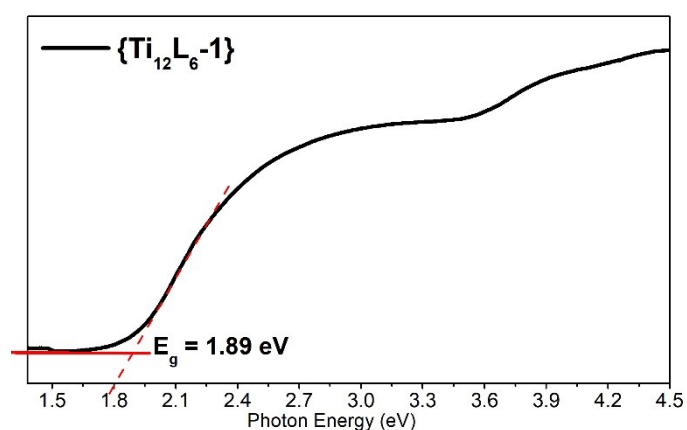

**Figure 54.** Kubelka–Munk transformation of diffuse reflectance data of  $\{\text{Ti}_{12}\text{L}_6\text{-1}\}$ .

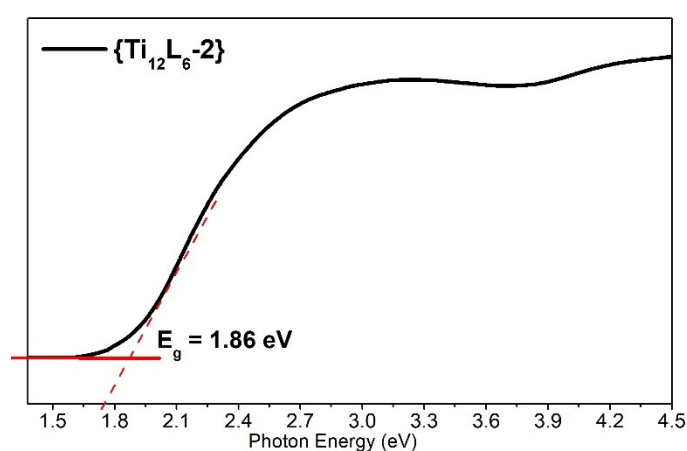

**Figure 55.** Kubelka–Munk transformation of diffuse reflectance data of  $\{\text{Ti}_{12}\text{L}_6\text{-2}\}$ .

### 10. $\text{H}_2$ Evolution Study.

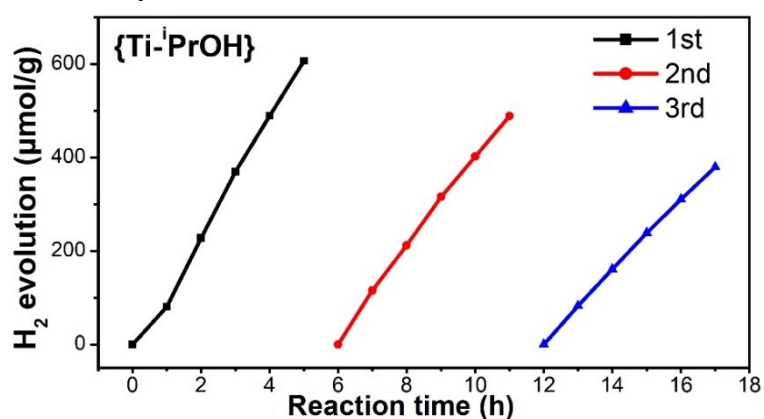

**Figure S56.** Recycling  $\text{H}_2$  evolution experiments of  $\{\text{Ti-iPrOH}\}$ .

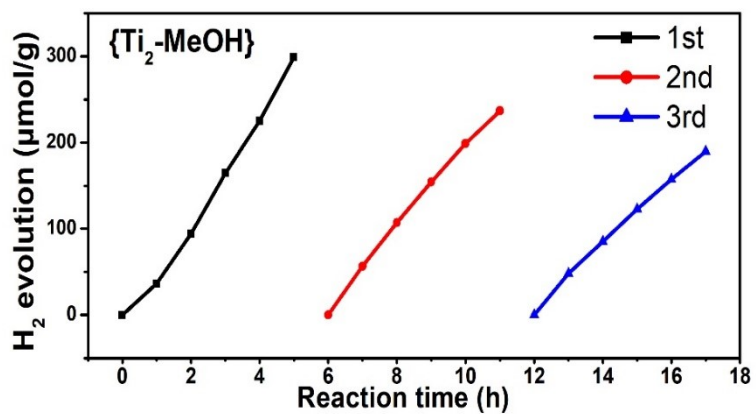

Figure S57. Recycling H<sub>2</sub> evolution experiments of {Ti<sub>2</sub>-MeOH}.

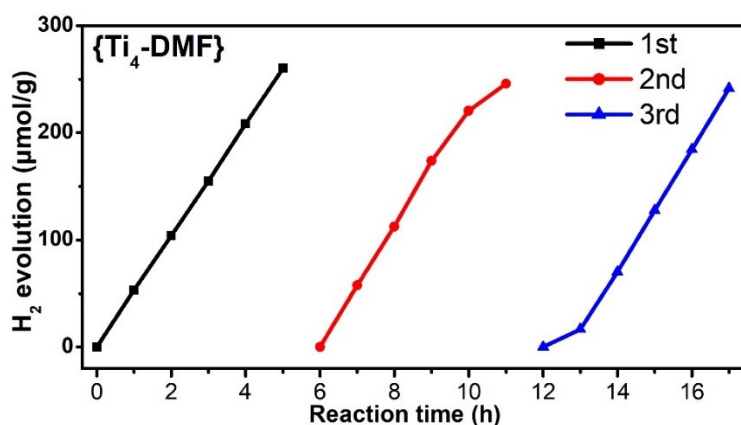

Figure S58. Recycling H<sub>2</sub> evolution experiments of {Ti<sub>4</sub>-DMF}

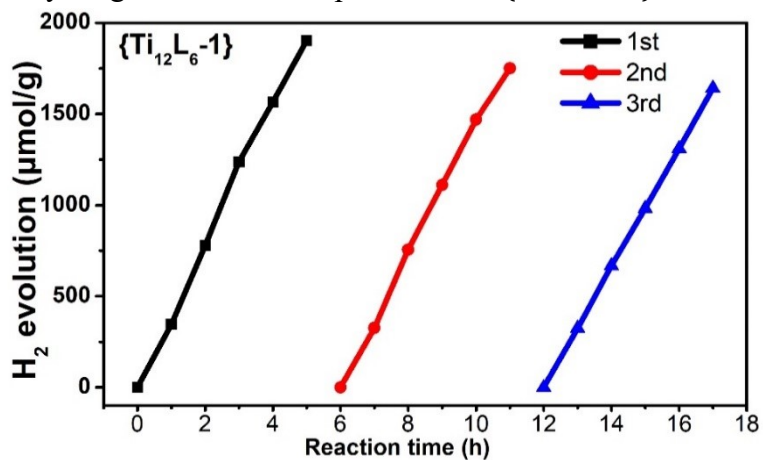

Figure S59. Recycling H<sub>2</sub> evolution experiments of {Ti<sub>12</sub>L<sub>6</sub>-1}.

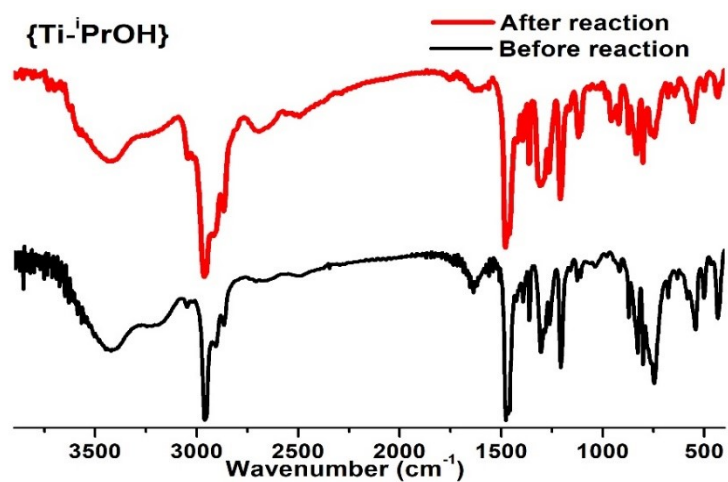

Figure S60. IR spectrum of {Ti-iPrOH} before and after photocatalytic reaction.

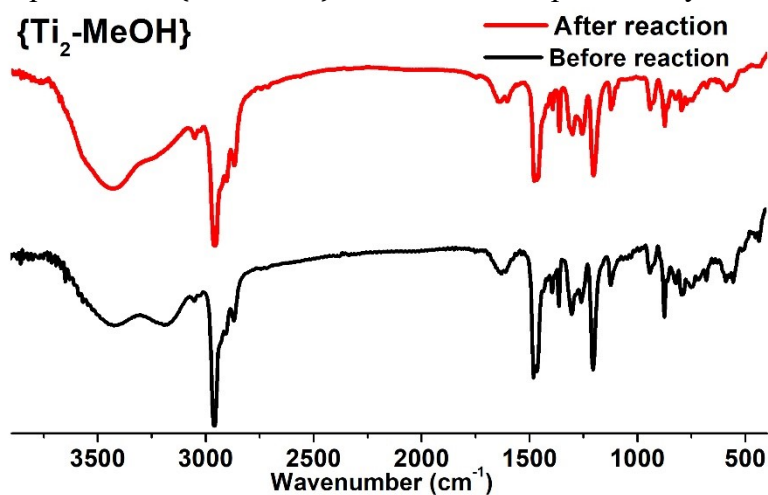

Figure S61. IR spectrum of {Ti<sub>2</sub>-MeOH} before and after photocatalytic reaction.

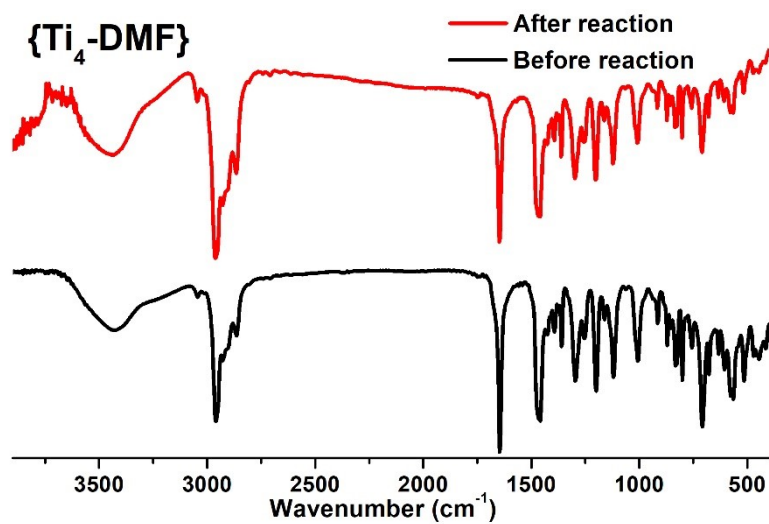

Figure S62. IR spectrum of {Ti<sub>4</sub>-DMF} before and after photocatalytic reaction.

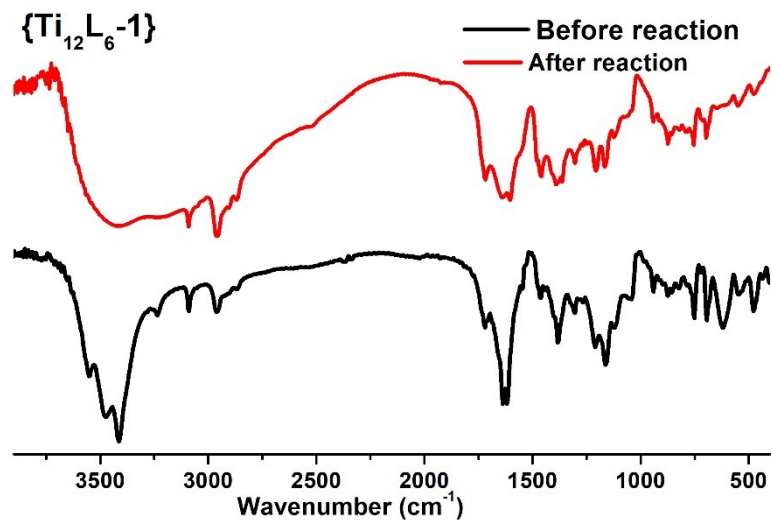

Figure S63. IR spectrum of  $\{\text{Ti}_{12}\text{L}_6\text{-1}\}$  before and after photocatalytic reaction.

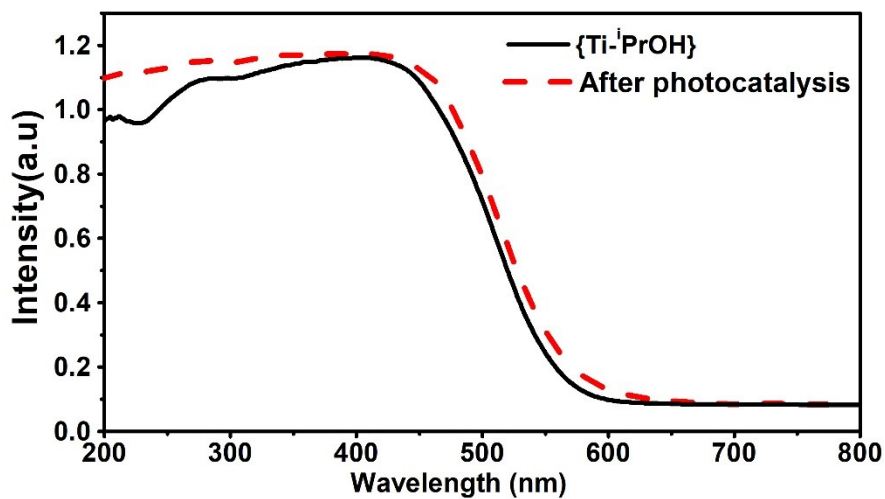

Figure S64. Solid-state UV-vis spectra of  $\{\text{Ti-iPrOH}\}$  and sample after photocatalytic experiment.

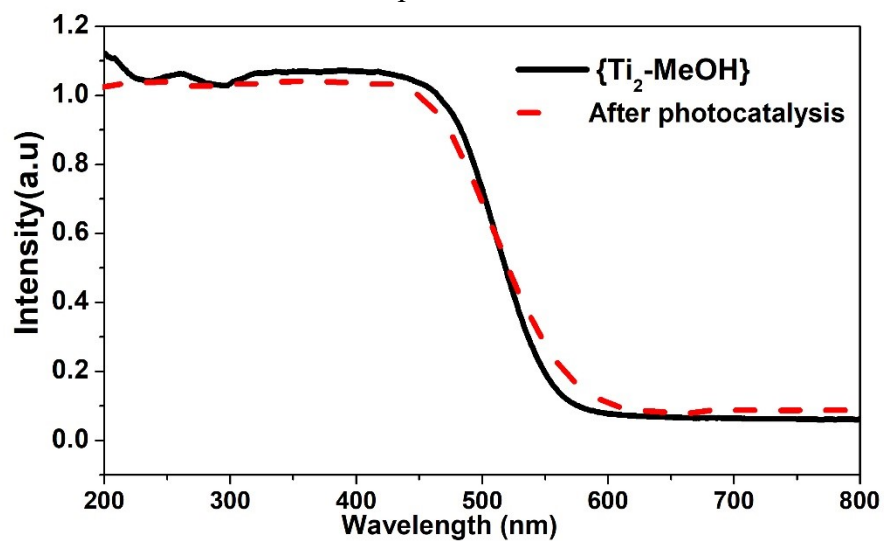

Figure S65. Solid-state UV-vis spectra of  $\{\text{Ti}_2\text{-MeOH}\}$  and sample after photocatalytic experiment.



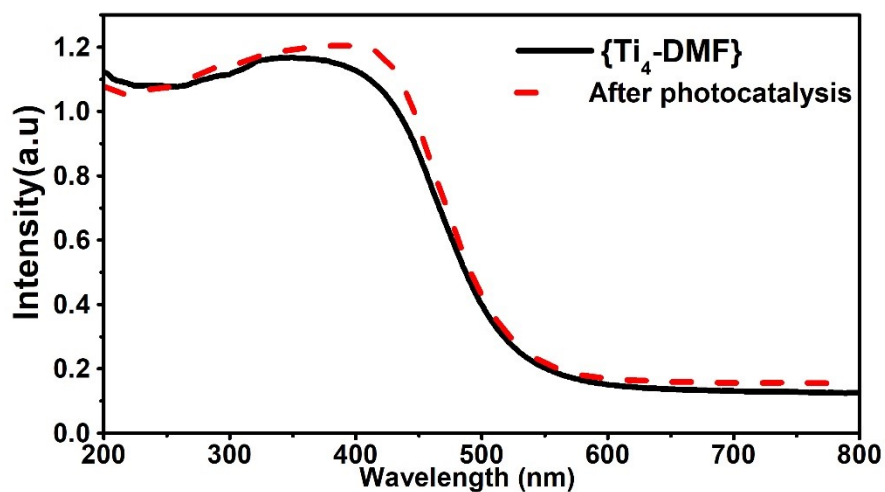

Figure S66. Solid-state UV-vis spectra of  $\{\text{Ti}_4\text{-DMF}\}$  and sample after photocatalytic experiment.

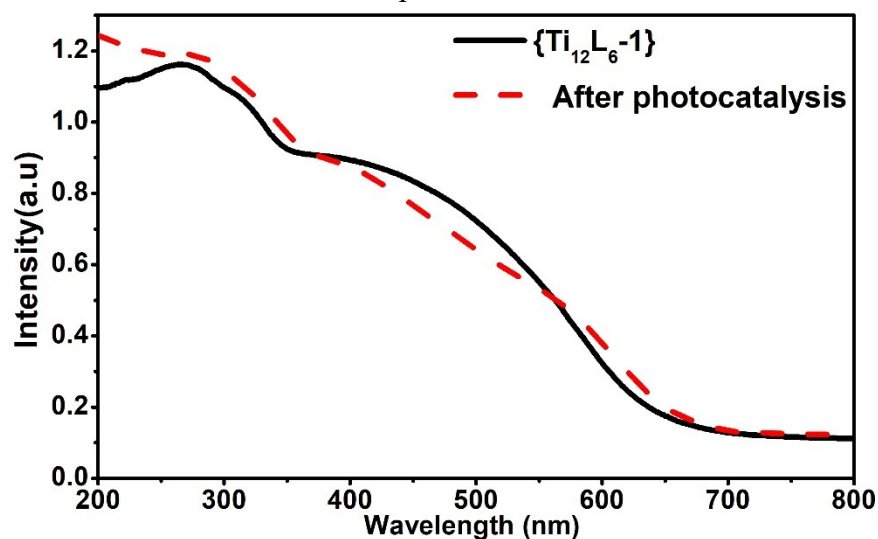

Figure S67. Solid-state UV-vis spectra of  $\{\text{Ti}_{12}\text{L}_6\text{-1}\}$  and sample after photocatalytic experiment.

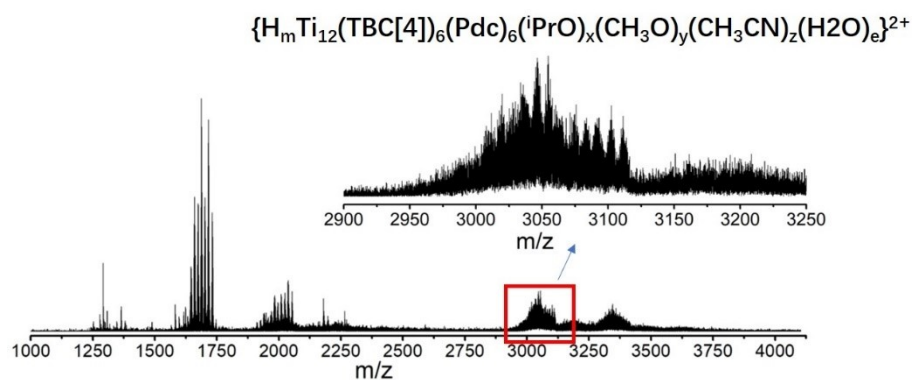

Figure S68. ESI-MS of  $\{\text{Ti}_{12}\text{L}_6\text{-1}\}$  after photocatalysis reaction.

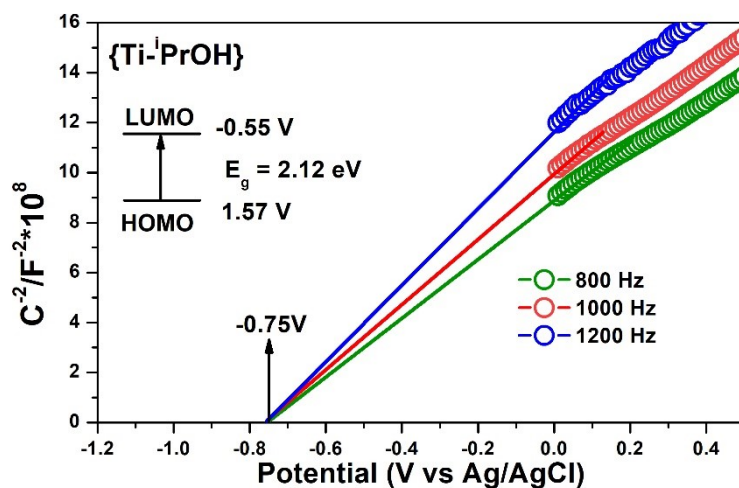

**Figure 69.** Mott-Schottky plot (insets are the estimated HOMO and LUMO levels of the cluster) of  $\{\text{Ti-PrOH}\}$ .

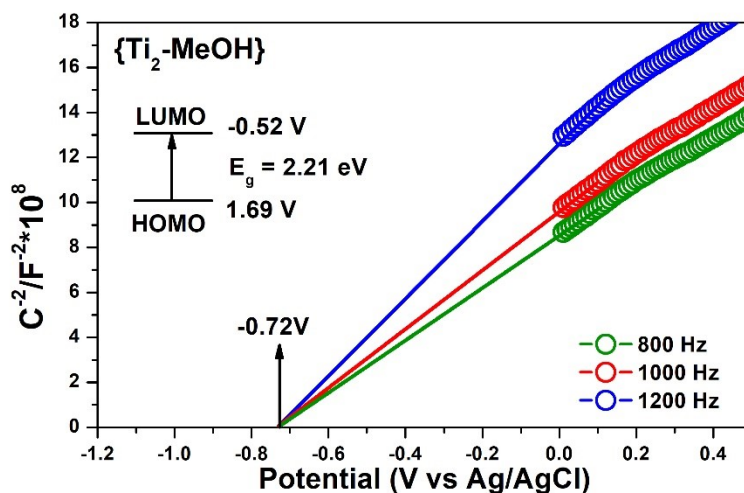

**Figure 70.** Mott-Schottky plot (insets are the estimated HOMO and LUMO levels of the cluster) of  $\{\text{Ti}_2\text{-MeOH}\}$ .

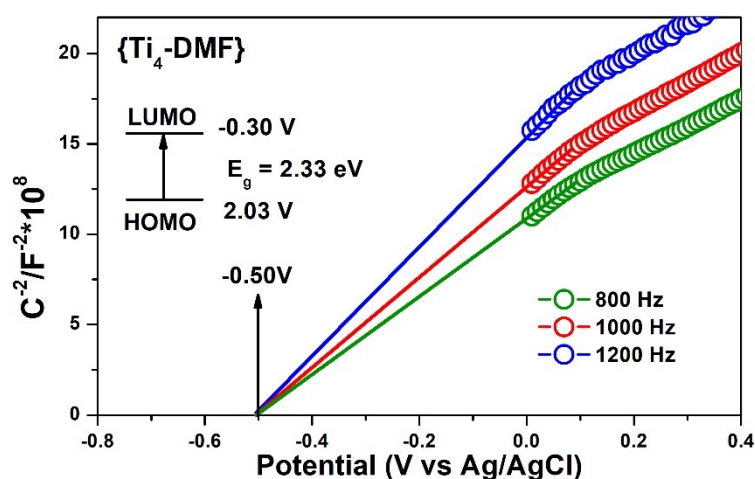

**Figure 71.** Mott-Schottky plot (insets are the estimated HOMO and LUMO levels of the cluster) of  $\{\text{Ti}_4\text{-DMF}\}$ .

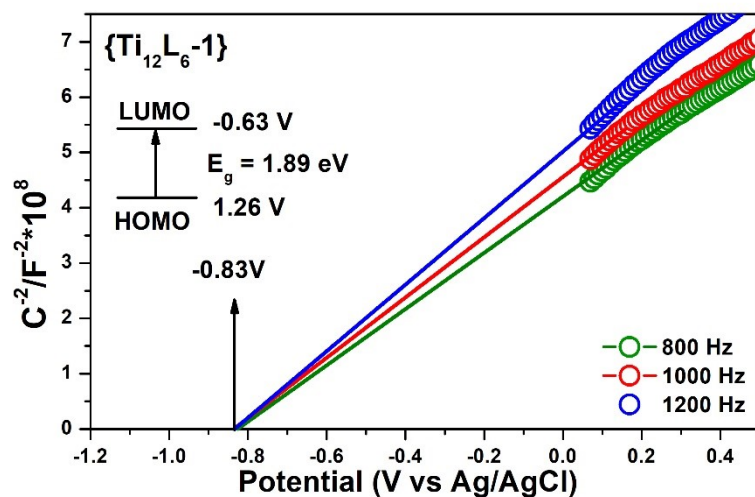

**Figure 72.** Mott–Schottky plot (insets are the estimated HOMO and LUMO levels of the cluster) of  $\{\text{Ti}_{12}\text{L}_6\text{-2}\}$ .

### 10. DFT Calculation.

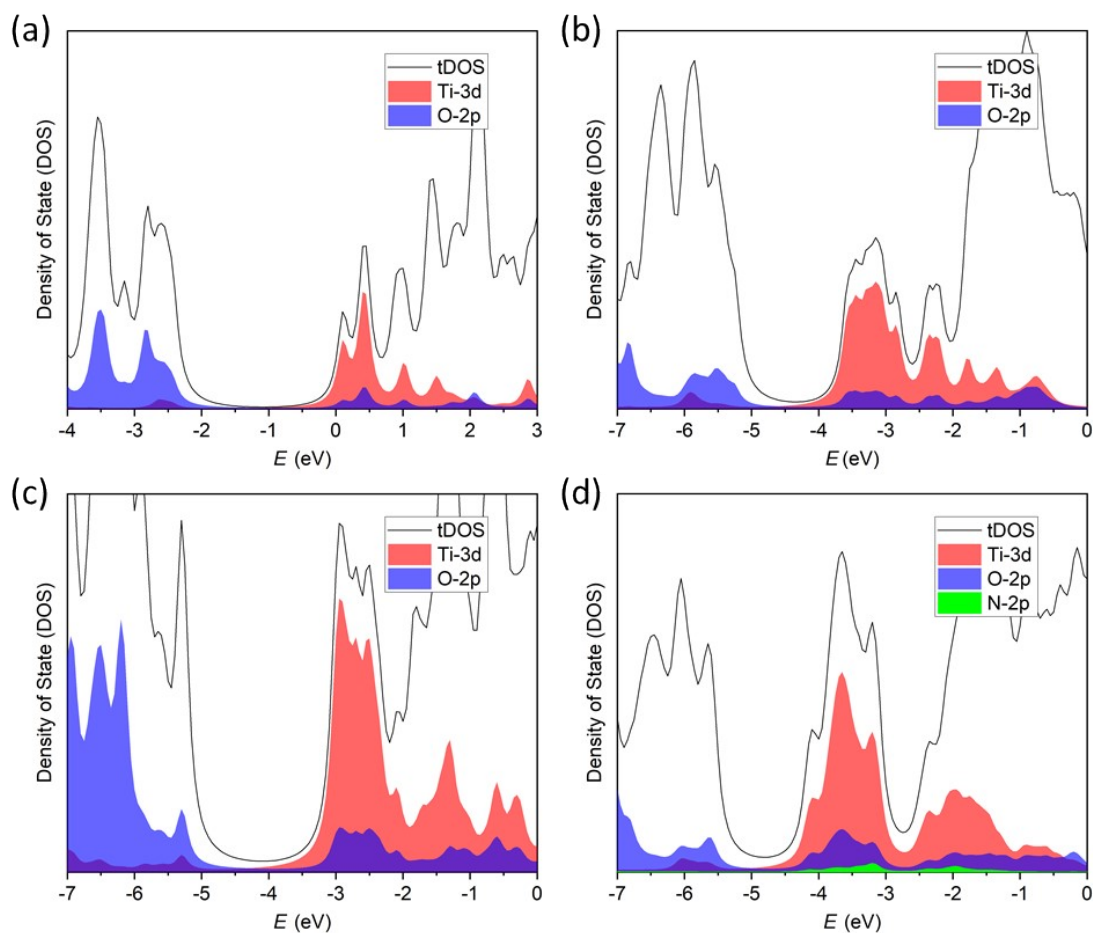

**Figure S73.** Total density of states (tDOS) and partial DOS (pDOS) for several atomic orbitals (AOs) in (a)  $\{\text{Ti-PrOH}\}$ , (b)  $\{\text{Ti}_2\text{-MeOH}\}$ , (c)  $\{\text{Ti}_4\text{-DMF}\}$  and (d)  $\{\text{Ti}_{12}\text{L}_6\text{-1}\}$ .

**Table S2.** Orbital energies of HOMO, LUMO and  $\Delta E_{\text{HL}}$  of the two cluster cages.

| Energy / eV                             | $E_{\text{HOMO}}$ | $E_{\text{LUMO}}$ | $\Delta E_{\text{HL}}$ |
|-----------------------------------------|-------------------|-------------------|------------------------|
| <b>{Ti<sub>4</sub>-DMF}</b>             | -5.265            | -3.013            | 2.252                  |
| <b>{Ti<sub>12</sub>L<sub>6</sub>-1}</b> | -5.558            | -4.175            | 1.383                  |
